# Supplementary material for: The nuclear basket proteins Mlp1p and Mlp2p are part of a dynamic interactome including Esc1p and the proteasome
Source: PubMed Central journal article supplement — Mol Biol Cell. 2013 Dec 15;24(24):3920–38. doi: 10.1091/mbc.E13-07-0412 (PMC3861087; doi:10.1091/mbc.e13-07-0412), 2013-12-15
Supplement: supp_E13-07-0412v1_CombinedSupMats.pdf [file supp_E13-07-0412v1_CombinedSupMats.pdf]

# Supplemental Materials

*Molecular Biology of the Cell*

Niepel et al.

## **Supplemental material for:**

### **The nuclear basket proteins Mlp1p and Mlp2p are part of a dynamic interactome including Esc1p and the proteasome**

Niepel, M., Molloy, K. R., Williams, R., Farr, J. C., Meinema, A. C., Vecchietti, N., Cristea, I. M., Chait, B., Rout, M. P., Strambio-De-Castillia, C.

#### **Index:**

**2 Supplemental Figures**

**7 Supplemental Tables**

**5 Supplemental Videos**

**Supplemental References**

## Supplemental Figures

**Figure S1.** The coiled-coil region of both Mlp proteins contains multiple discontinuities and protease sensitive regions.

**Figure S2.** The nuclear basket keeps the central NPC transporter clear of RNA-rich electron-dense particles.

## Supplemental Table

**Table S1.** Proteins identified in gels shown in Figure 1A and 1B.

**Table S2.** Proteins identified in gels shown in Figure 1C, 1D and 1E.

**Table S3.** Proteins identified in gels shown in Figure 2A.

**Table S4.** Proteins identified in gels shown in Figure 2B.

**Table S5.** Proteins identified in gels shown in Figure, 2C.

**Table S6.** Cleavage fragments identified in gels shown in Figure S4A and S4B.

**Table S7.** List of *S. cerevisiae* strains used in study.

## Supplemental Videos

**Video S1.** Movie of a FRAP experiment of Nup49p-GFP in a *wild type* strain.

**Video S2.** Movie of a FRAP experiment of Nup49p-GFP in *mlp1Δmlp2Δ* strain.

**Video S3.** Movie of a FRAP experiment of Nup49p-GFP in *mlp1Δmlp2Δ* strain.

**Video S4.** Movie of a FRAP experiment of Nup49p-GFP in *mlp1Δmlp2Δ* strain.

**Video S5.** Movie of a FRAP experiment of Mlp1p-GFP/Mlp2p-GFP in *wild type* strain.

## Supplemental references

(References associated with Table S7)

- Brachmann, C.B., Davies, A., Cost, G.J., Caputo, E., Li, J., Hieter, P., and Boeke, J.D. (1998). Designer deletion strains derived from *Saccharomyces cerevisiae* S288C: a useful set of strains and plasmids for PCR-mediated gene disruption and other applications. *Yeast* *14*, 115-132.
- Bucci, M., and Wenthe, S.R. (1997). In vivo dynamics of nuclear pore complexes in yeast. *J. Cell Biol.* *136*, 1185-1199.
- Doye, V., Wepf, R., and Hurt, E.C. (1994). A novel nuclear pore protein Nup133p with distinct roles in poly(A)<sup>+</sup> RNA transport and nuclear pore distribution. *EMBO J* *13*, 6062-6075.
- Giaever, G., *et al.* (2002). Functional profiling of the *Saccharomyces cerevisiae* genome. *Nature* *418*, 387-391.
- Huh, W., Falvo, J., Gerke, L., Carroll, A., Howson, R., Weissman, J., and O'shea, E. (2003). Global analysis of protein localization in budding yeast. *Nature* *425*, 686-691.
- Niepel, M., Strambio-de-Castillia, C., Fasolo, J., Chait, B.T., and Rout, M.P. (2005). The nuclear pore complex-associated protein, Mlp2p, binds to the yeast spindle pole body and promotes its efficient assembly. *J Cell Biol* *170*, 225-235.
- Strambio-de-Castillia, C., Blobel, G., and Rout, M.P. (1999). Proteins connecting the nuclear pore complex with the nuclear interior. *J Cell Biol* *144*, 839-855.
- Thomas, B.J., and Rothstein, R. (1989). Elevated recombination rates in transcriptionally active DNA. *Cell* *56*, 619-630.



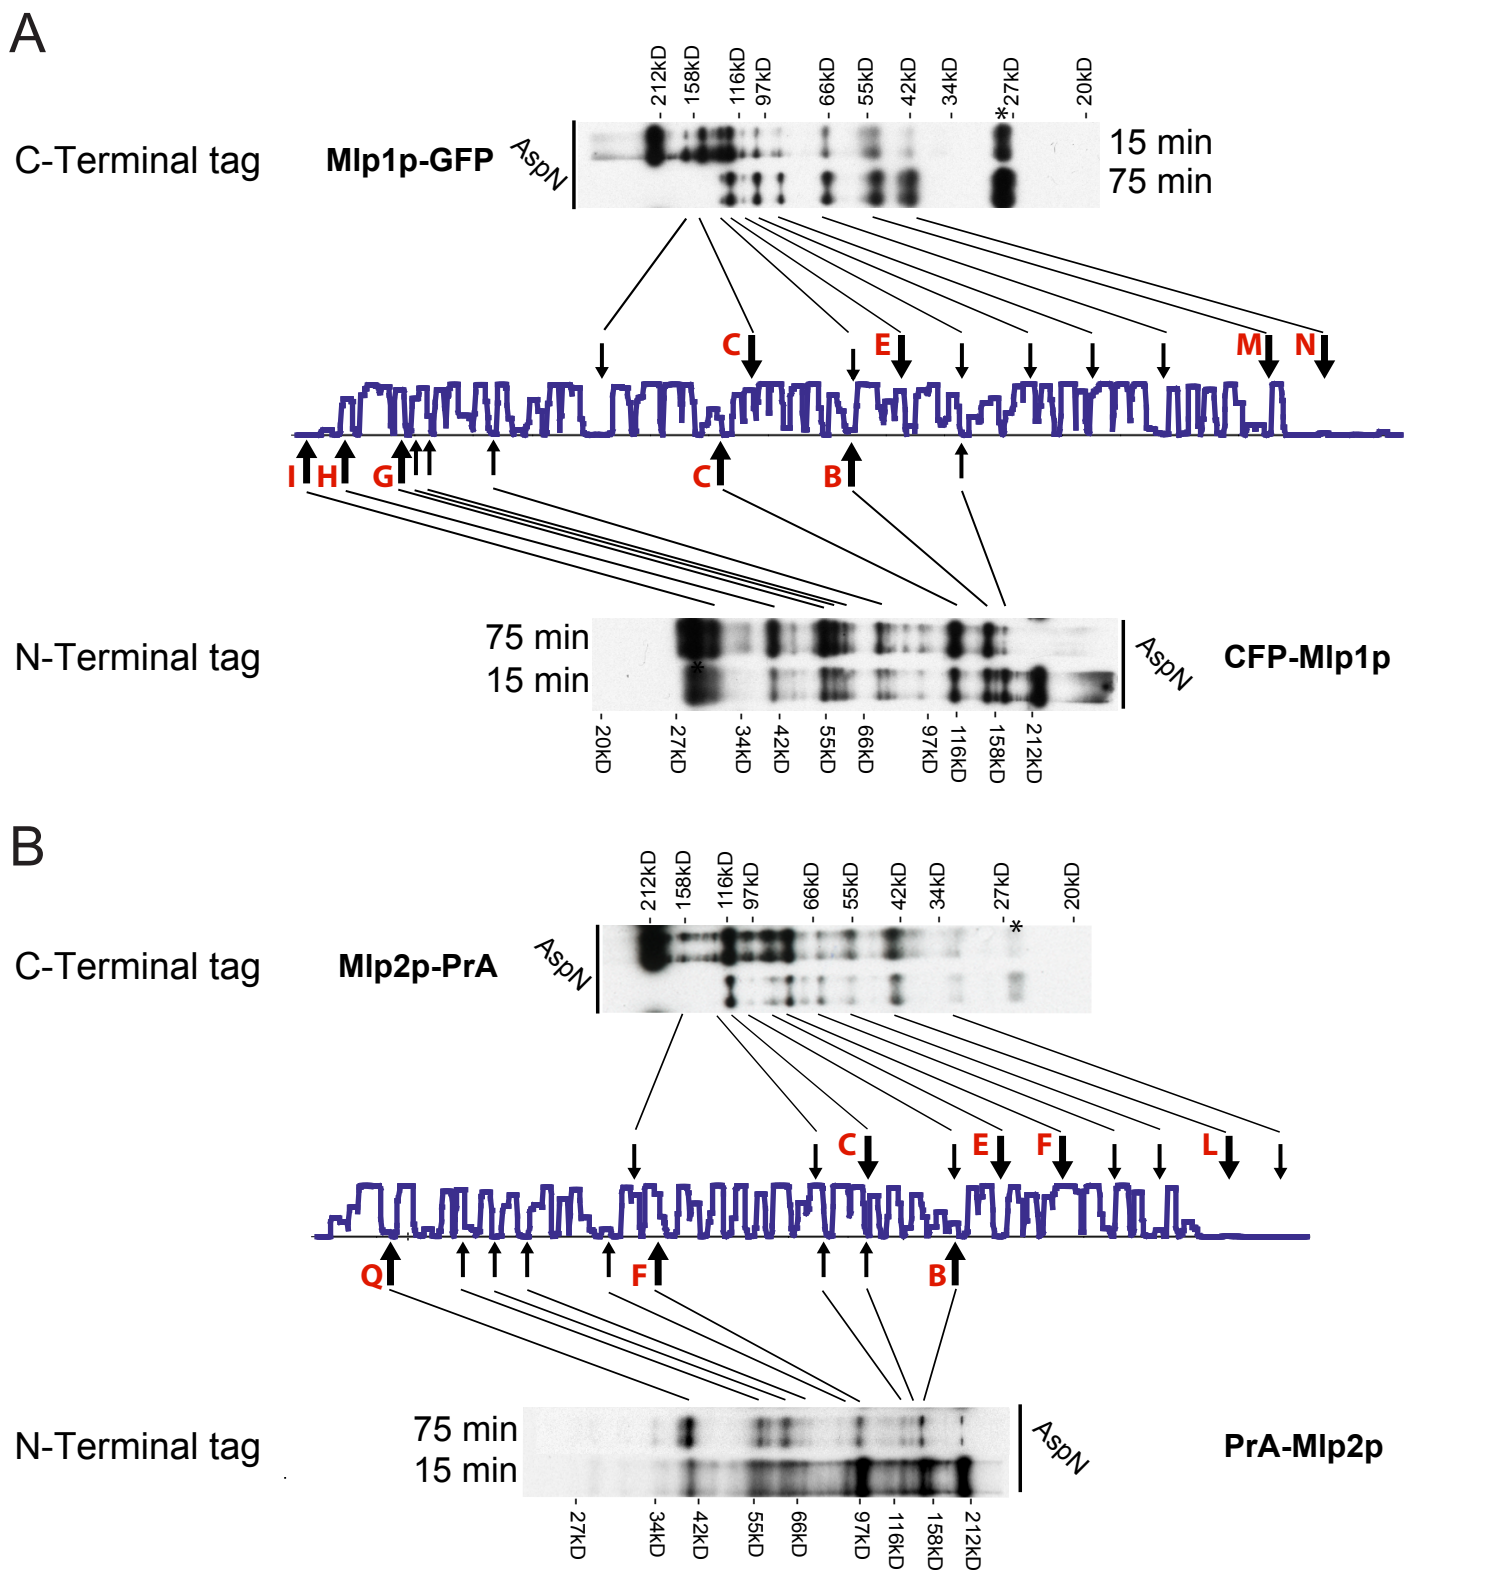

**Figure S1.** The coiled-coil region of both Mlp proteins contains multiple discontinuities and protease sensitive regions. Protease accessibility laddering (PAL) of (A) Mlp1p and (B) Mlp2p shows that sites of AspN protease cleavage, indicated above and below PAGE panels (vertical arrows), correspond to PARCOIL-predicted discontinuities in coiled-coil formation as calculated using 14-aa sliding windows. Arrow sizes represent relative degrees of protease sensitivity at the indicated sites, measured by quantifying the band intensity of individual protease fragments. The complete list of the AspN protease fragments with the corresponding estimated molecular weights and cleavage sites is listed in Table S6. Labels on the arrows correspond to labels in Table S6.

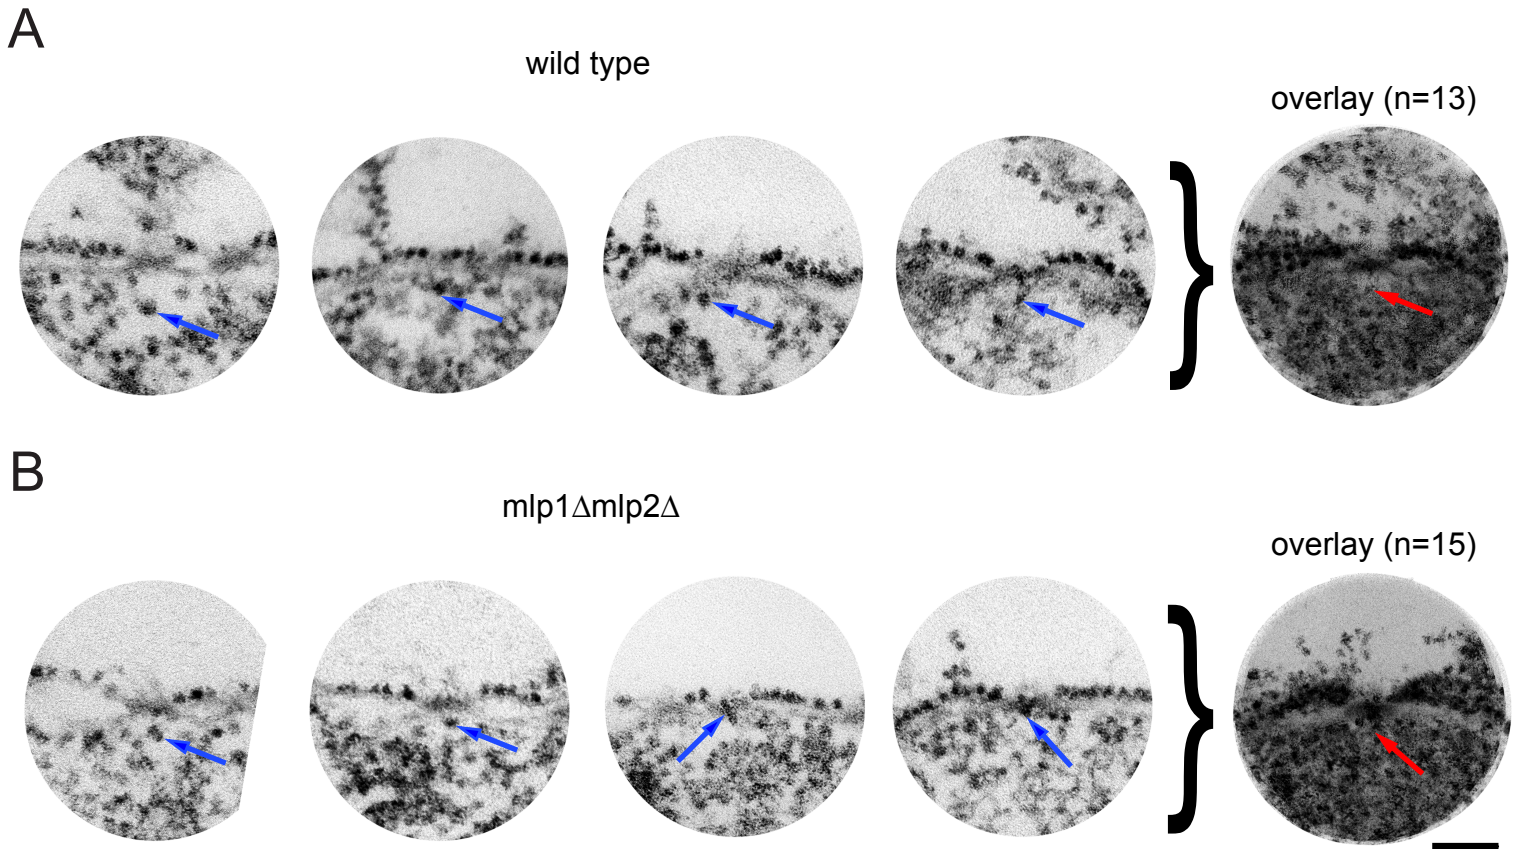

**Figure S2.** The nuclear basket keeps the central NPC transporter clear of RNA-rich electron-dense particles. (Left panels) Bernhard's EDTA-stained thin-section electron micrographs of four NPCs showing electron-dense RNA-rich particles (blue arrows), docking at or traversing through NPCs in (A) wild type and (B) *mlp1Δmlp2Δ* cells. In wild type cells, electron-dense particles are found near the distal ring at the nuclear basket. In *mlp1Δmlp2Δ* cells the particles appear to be closer to if not overlapping with the the NPC central tube. (Right panels) Overlays of multiple Bernhard's EDTA-stained images show that in *mlp1Δmlp2Δ* cells the nuclear face of NPCs appear to be significantly more crowded with RNA-containing electron-dense material than in wild type cells (red arrows). Bar: 100 nm.

Supplemental Table 1 - Proteins identified in gels shown in Figure 1A and 1B.

| Bait     | Target  | Target (Systematic) | MS/MS score | NaCl Concentration | Extraction Buffer                                                                      |
|----------|---------|---------------------|-------------|--------------------|----------------------------------------------------------------------------------------|
| Mlp1-PrA | Kap60   | YNL189W             | 10-3        | 0 mM               | 20 mM Na-Hepes, pH 7.4, 0.5 % Triton-X-100, 1 mM DTT, 4 g/ml pepstatin, 0.2 mg/ml PMSF |
| Mlp1-PrA | Kap60   | YNL189W             | 10-13       | 0 mM               | 20 mM Na-Hepes, pH 7.4, 0.5 % Triton-X-100, 1 mM DTT, 4 g/ml pepstatin, 0.2 mg/ml PMSF |
| Mlp1-PrA | Kap95   | YLR347C             | 2.9*10-2    | 0 mM               | 20 mM Na-Hepes, pH 7.4, 0.5 % Triton-X-100, 1 mM DTT, 4 g/ml pepstatin, 0.2 mg/ml PMSF |
| Mlp1-PrA | Mex67   | YGL169C             | 10-11       | 0 mM               | 20 mM Na-Hepes, pH 7.4, 0.5 % Triton-X-100, 1 mM DTT, 4 g/ml pepstatin, 0.2 mg/ml PMSF |
| Mlp1-PrA | Mex67   | YPL169C             | 4.4*10-2    | 0 mM               | 20 mM Na-Hepes, pH 7.4, 0.5 % Triton-X-100, 1 mM DTT, 4 g/ml pepstatin, 0.2 mg/ml PMSF |
| Mlp1-PrA | Mlp1    | YKR095W             | 10-2        | 0 mM               | 20 mM Na-Hepes, pH 7.4, 0.5 % Triton-X-100, 1 mM DTT, 4 g/ml pepstatin, 0.2 mg/ml PMSF |
| Mlp1-PrA | Mlp2    | YIL149C             | 10-5        | 0 mM               | 20 mM Na-Hepes, pH 7.4, 0.5 % Triton-X-100, 1 mM DTT, 4 g/ml pepstatin, 0.2 mg/ml PMSF |
| Mlp1-PrA | Nic96   | YFR002W             | 10-6        | 0 mM               | 20 mM Na-Hepes, pH 7.4, 0.5 % Triton-X-100, 1 mM DTT, 4 g/ml pepstatin, 0.2 mg/ml PMSF |
| Mlp1-PrA | Nsp1    | YIL041W             | 10-8        | 0 mM               | 20 mM Na-Hepes, pH 7.4, 0.5 % Triton-X-100, 1 mM DTT, 4 g/ml pepstatin, 0.2 mg/ml PMSF |
| Mlp1-PrA | Nup133  | YKR082W             | 10-8        | 0 mM               | 20 mM Na-Hepes, pH 7.4, 0.5 % Triton-X-100, 1 mM DTT, 4 g/ml pepstatin, 0.2 mg/ml PMSF |
| Mlp1-PrA | Nup145C | YGL092W             | 10-4        | 0 mM               | 20 mM Na-Hepes, pH 7.4, 0.5 % Triton-X-100, 1 mM DTT, 4 g/ml pepstatin, 0.2 mg/ml PMSF |
| Mlp1-PrA | Nup159  | YIL115C             | 10-8        | 0 mM               | 20 mM Na-Hepes, pH 7.4, 0.5 % Triton-X-100, 1 mM DTT, 4 g/ml pepstatin, 0.2 mg/ml PMSF |
| Mlp1-PrA | Nup170  | YBL079W             | 10-5        | 0 mM               | 20 mM Na-Hepes, pH 7.4, 0.5 % Triton-X-100, 1 mM DTT, 4 g/ml pepstatin, 0.2 mg/ml PMSF |
| Mlp1-PrA | Nup188  | YML103C             | 10-3        | 0 mM               | 20 mM Na-Hepes, pH 7.4, 0.5 % Triton-X-100, 1 mM DTT, 4 g/ml pepstatin, 0.2 mg/ml PMSF |
| Mlp1-PrA | Nup192  | YIL039C             | 10-14       | 0 mM               | 20 mM Na-Hepes, pH 7.4, 0.5 % Triton-X-100, 1 mM DTT, 4 g/ml pepstatin, 0.2 mg/ml PMSF |
| Mlp1-PrA | Nup2    | YLR335W             | 10-4        | 0 mM               | 20 mM Na-Hepes, pH 7.4, 0.5 % Triton-X-100, 1 mM DTT, 4 g/ml pepstatin, 0.2 mg/ml PMSF |
| Mlp1-PrA | Nup53   | YMR153W             | 10-3        | 0 mM               | 20 mM Na-Hepes, pH 7.4, 0.5 % Triton-X-100, 1 mM DTT, 4 g/ml pepstatin, 0.2 mg/ml PMSF |
| Mlp1-PrA | Nup60   | YAR002W             | 10-5        | 0 mM               | 20 mM Na-Hepes, pH 7.4, 0.5 % Triton-X-100, 1 mM DTT, 4 g/ml pepstatin, 0.2 mg/ml PMSF |
| Mlp1-PrA | Nup82   | YJL061W             | 10-7        | 0 mM               | 20 mM Na-Hepes, pH 7.4, 0.5 % Triton-X-100, 1 mM DTT, 4 g/ml pepstatin, 0.2 mg/ml PMSF |
| Mlp1-PrA | Nup84   | YDL116W             | 10-6        | 0 mM               | 20 mM Na-Hepes, pH 7.4, 0.5 % Triton-X-100, 1 mM DTT, 4 g/ml pepstatin, 0.2 mg/ml PMSF |
| Mlp1-PrA | Nup85   | YJR042W             | 10-16       | 0 mM               | 20 mM Na-Hepes, pH 7.4, 0.5 % Triton-X-100, 1 mM DTT, 4 g/ml pepstatin, 0.2 mg/ml PMSF |
| Mlp1-PrA | Pdc1    | YLR044C             | 10-4        | 0 mM               | 20 mM Na-Hepes, pH 7.4, 0.5 % Triton-X-100, 1 mM DTT, 4 g/ml pepstatin, 0.2 mg/ml PMSF |
| Mlp1-PrA | Pgk1    | YCR012W             | 10-10       | 0 mM               | 20 mM Na-Hepes, pH 7.4, 0.5 % Triton-X-100, 1 mM DTT, 4 g/ml pepstatin, 0.2 mg/ml PMSF |
| Mlp1-PrA | Rps1a   | YLR441C             | 10-3        | 0 mM               | 20 mM Na-Hepes, pH 7.4, 0.5 % Triton-X-100, 1 mM DTT, 4 g/ml pepstatin, 0.2 mg/ml PMSF |
| Mlp1-PrA | Seh1    | YGL100W             | 10-11       | 0 mM               | 20 mM Na-Hepes, pH 7.4, 0.5 % Triton-X-100, 1 mM DTT, 4 g/ml pepstatin, 0.2 mg/ml PMSF |
| Mlp1-PrA | Ssa1    | YAL005C             | 10-7        | 0 mM               | 20 mM Na-Hepes, pH 7.4, 0.5 % Triton-X-100, 1 mM DTT, 4 g/ml pepstatin, 0.2 mg/ml PMSF |
| Mlp1-PrA | Ssb1    | YDL229W             | 10-10       | 0 mM               | 20 mM Na-Hepes, pH 7.4, 0.5 % Triton-X-100, 1 mM DTT, 4 g/ml pepstatin, 0.2 mg/ml PMSF |
| Mlp1-PrA | Tef1    | YPR080W             | 10-3        | 0 mM               | 20 mM Na-Hepes, pH 7.4, 0.5 % Triton-X-100, 1 mM DTT, 4 g/ml pepstatin, 0.2 mg/ml PMSF |
| Mlp1-PrA | Yef3    | YLR249W             | 10-2        | 0 mM               | 20 mM Na-Hepes, pH 7.4, 0.5 % Triton-X-100, 1 mM DTT, 4 g/ml pepstatin, 0.2 mg/ml PMSF |
| Mlp1-PrA | Yra1    | YDR381W             | 10-10       | 0 mM               | 20 mM Na-Hepes, pH 7.4, 0.5 % Triton-X-100, 1 mM DTT, 4 g/ml pepstatin, 0.2 mg/ml PMSF |
| Mlp1-PrA | Eno1    | YGR254W             | 10-11       | 100 mM             | 20 mM Na-Hepes, pH 7.4, 0.5 % Triton-X-100, 1 mM DTT, 4 g/ml pepstatin, 0.2 mg/ml PMSF |
| Mlp1-PrA | Eno1    | YGR254W             | 10-5        | 100 mM             | 20 mM Na-Hepes, pH 7.4, 0.5 % Triton-X-100, 1 mM DTT, 4 g/ml pepstatin, 0.2 mg/ml PMSF |
| Mlp1-PrA | Eno2    | YHR174W             | 10-12       | 100 mM             | 20 mM Na-Hepes, pH 7.4, 0.5 % Triton-X-100, 1 mM DTT, 4 g/ml pepstatin, 0.2 mg/ml PMSF |
| Mlp1-PrA | Eno2    | YHR174W             | 10-4        | 100 mM             | 20 mM Na-Hepes, pH 7.4, 0.5 % Triton-X-100, 1 mM DTT, 4 g/ml pepstatin, 0.2 mg/ml PMSF |
| Mlp1-PrA | Tef2    | YBR118W             | 10-2        | 100 mM             | 20 mM Na-Hepes, pH 7.4, 0.5 % Triton-X-100, 1 mM DTT, 4 g/ml pepstatin, 0.2 mg/ml PMSF |
| Mlp1-PrA | Mlp2    | YIL149C             | 10-2        | 150 mM             | 20 mM Na-Hepes, pH 7.4, 0.5 % Triton-X-100, 1 mM DTT, 4 g/ml pepstatin, 0.2 mg/ml PMSF |
| Mlp1-PrA | Nic96   | YFR002W             | 10-6        | 150 mM             | 20 mM Na-Hepes, pH 7.4, 0.5 % Triton-X-100, 1 mM DTT, 4 g/ml pepstatin, 0.2 mg/ml PMSF |
| Mlp1-PrA | Nsp1    | YIL041W             | 10-38       | 150 mM             | 20 mM Na-Hepes, pH 7.4, 0.5 % Triton-X-100, 1 mM DTT, 4 g/ml pepstatin, 0.2 mg/ml PMSF |
| Mlp1-PrA | Nup116  | YMR047C             | 10-8        | 150 mM             | 20 mM Na-Hepes, pH 7.4, 0.5 % Triton-X-100, 1 mM DTT, 4 g/ml pepstatin, 0.2 mg/ml PMSF |
| Mlp1-PrA | Nup120  | YKL057C             | 10-9        | 150 mM             | 20 mM Na-Hepes, pH 7.4, 0.5 % Triton-X-100, 1 mM DTT, 4 g/ml pepstatin, 0.2 mg/ml PMSF |
| Mlp1-PrA | Nup133  | YKR082W             | 10-12       | 150 mM             | 20 mM Na-Hepes, pH 7.4, 0.5 % Triton-X-100, 1 mM DTT, 4 g/ml pepstatin, 0.2 mg/ml PMSF |
| Mlp1-PrA | Nup145  | YGL092W             | 10-7        | 150 mM             | 20 mM Na-Hepes, pH 7.4, 0.5 % Triton-X-100, 1 mM DTT, 4 g/ml pepstatin, 0.2 mg/ml PMSF |
| Mlp1-PrA | Nup159  | YIL115C             | 10-16       | 150 mM             | 20 mM Na-Hepes, pH 7.4, 0.5 % Triton-X-100, 1 mM DTT, 4 g/ml pepstatin, 0.2 mg/ml PMSF |
| Mlp1-PrA | Nup170  | YBL079W             | 10-7        | 150 mM             | 20 mM Na-Hepes, pH 7.4, 0.5 % Triton-X-100, 1 mM DTT, 4 g/ml pepstatin, 0.2 mg/ml PMSF |
| Mlp1-PrA | Nup192  | YIL039C             | 10-7        | 150 mM             | 20 mM Na-Hepes, pH 7.4, 0.5 % Triton-X-100, 1 mM DTT, 4 g/ml pepstatin, 0.2 mg/ml PMSF |
| Mlp1-PrA | Nup2    | YLR335W             | 10-15       | 150 mM             | 20 mM Na-Hepes, pH 7.4, 0.5 % Triton-X-100, 1 mM DTT, 4 g/ml pepstatin, 0.2 mg/ml PMSF |
| Mlp1-PrA | Nup53   | YMR153W             | 10-4        | 150 mM             | 20 mM Na-Hepes, pH 7.4, 0.5 % Triton-X-100, 1 mM DTT, 4 g/ml pepstatin, 0.2 mg/ml PMSF |
| Mlp1-PrA | Nup57   | YGR119C             | 8*10-2      | 150 mM             | 20 mM Na-Hepes, pH 7.4, 0.5 % Triton-X-100, 1 mM DTT, 4 g/ml pepstatin, 0.2 mg/ml PMSF |
| Mlp1-PrA | Nup82   | YJL061W             | 10-6        | 150 mM             | 20 mM Na-Hepes, pH 7.4, 0.5 % Triton-X-100, 1 mM DTT, 4 g/ml pepstatin, 0.2 mg/ml PMSF |
| Mlp1-PrA | Nup84   | YDL116W             | 10-5        | 150 mM             | 20 mM Na-Hepes, pH 7.4, 0.5 % Triton-X-100, 1 mM DTT, 4 g/ml pepstatin, 0.2 mg/ml PMSF |
| Mlp1-PrA | Nup85   | YJR042W             | 10-6        | 150 mM             | 20 mM Na-Hepes, pH 7.4, 0.5 % Triton-X-100, 1 mM DTT, 4 g/ml pepstatin, 0.2 mg/ml PMSF |
| Mlp1-PrA | Sac3p   | YDR159W             | 10-8        | 150 mM             | 20 mM Na-Hepes, pH 7.4, 0.5 % Triton-X-100, 1 mM DTT, 4 g/ml pepstatin, 0.2 mg/ml PMSF |
| Mlp1-PrA | Seh1    | YGL100W             | 10-7        | 150 mM             | 20 mM Na-Hepes, pH 7.4, 0.5 % Triton-X-100, 1 mM DTT, 4 g/ml pepstatin, 0.2 mg/ml PMSF |
| Mlp1-PrA | Yra1    | YDR381W             | 10-3        | 150 mM             | 20 mM Na-Hepes, pH 7.4, 0.5 % Triton-X-100, 1 mM DTT, 4 g/ml pepstatin, 0.2 mg/ml PMSF |
| Mlp1-PrA | Kap60   | YPL169C             | 10-2        | 150 mM             | 20 mM Na-Hepes, pH 7.4, 0.5 % Triton-X-100, 1 mM DTT, 4 g/ml pepstatin, 0.2 mg/ml PMSF |
| Mlp1-PrA | Kap60   | YPL169C             | 10-7        | 150 mM             | 20 mM Na-Hepes, pH 7.4, 0.5 % Triton-X-100, 1 mM DTT, 4 g/ml pepstatin, 0.2 mg/ml PMSF |
| Mlp1-PrA | Mex67   | YPL169C             | 10-8        | 150 mM             | 20 mM Na-Hepes, pH 7.4, 0.5 % Triton-X-100, 1 mM DTT, 4 g/ml pepstatin, 0.2 mg/ml PMSF |
| Mlp1-PrA | Mex67   | YPL169C             | 10-6        | 150 mM             | 20 mM Na-Hepes, pH 7.4, 0.5 % Triton-X-100, 1 mM DTT, 4 g/ml pepstatin, 0.2 mg/ml PMSF |
| Mlp1-PrA | Mlp1    | YKR095W             | 10-7        | 150 mM             | 20 mM Na-Hepes, pH 7.4, 0.5 % Triton-X-100, 1 mM DTT, 4 g/ml pepstatin, 0.2 mg/ml PMSF |
| Mlp1-PrA | Mlp1    | YKR095W             | 0.08        | 150 mM             | 20 mM Na-Hepes, pH 7.4, 0.5 % Triton-X-100, 1 mM DTT, 4 g/ml pepstatin, 0.2 mg/ml PMSF |
| Mlp1-PrA | Mlp1    | YKR095W             | 10-2        | 150 mM             | 20 mM Na-Hepes, pH 7.4, 0.5 % Triton-X-100, 1 mM DTT, 4 g/ml pepstatin, 0.2 mg/ml PMSF |
| Mlp1-PrA | Mlp1    | YKR095W             | 10-2        | 150 mM             | 20 mM Na-Hepes, pH 7.4, 0.5 % Triton-X-100, 1 mM DTT, 4 g/ml pepstatin, 0.2 mg/ml PMSF |
| Mlp1-PrA | Mlp1    | YKR095W             | 10-2        | 150 mM             | 20 mM Na-Hepes, pH 7.4, 0.5 % Triton-X-100, 1 mM DTT, 4 g/ml pepstatin, 0.2 mg/ml PMSF |

| Bait     | Target  | Target (Systematic) | MS/MS score | NaCl Concentration | Extraction Buffer                                                                      |
|----------|---------|---------------------|-------------|--------------------|----------------------------------------------------------------------------------------|
| Mlp2-PrA | Dbp3    | YGL078C             | 10-2        | 0 mM               | 20 mM Na-Hepes, pH 7.4, 0.5 % Triton-X-100, 1 mM DTT, 4 g/ml pepstatin, 0.2 mg/ml PMSF |
| Mlp2-PrA | Etf2    | YDR385W             | 10-6        | 0 mM               | 20 mM Na-Hepes, pH 7.4, 0.5 % Triton-X-100, 1 mM DTT, 4 g/ml pepstatin, 0.2 mg/ml PMSF |
| Mlp2-PrA | Fpr3    | YML074C             | 10-3        | 0 mM               | 20 mM Na-Hepes, pH 7.4, 0.5 % Triton-X-100, 1 mM DTT, 4 g/ml pepstatin, 0.2 mg/ml PMSF |
| Mlp2-PrA | Kap60   | YPL169C             | 10-3        | 0 mM               | 20 mM Na-Hepes, pH 7.4, 0.5 % Triton-X-100, 1 mM DTT, 4 g/ml pepstatin, 0.2 mg/ml PMSF |
| Mlp2-PrA | Mex67   | YPL169C             | 10-4        | 0 mM               | 20 mM Na-Hepes, pH 7.4, 0.5 % Triton-X-100, 1 mM DTT, 4 g/ml pepstatin, 0.2 mg/ml PMSF |
| Mlp2-PrA | Nic96   | YFR002W             | 10-3        | 0 mM               | 20 mM Na-Hepes, pH 7.4, 0.5 % Triton-X-100, 1 mM DTT, 4 g/ml pepstatin, 0.2 mg/ml PMSF |
| Mlp2-PrA | Nop58   | YOR310C             | 10-6        | 0 mM               | 20 mM Na-Hepes, pH 7.4, 0.5 % Triton-X-100, 1 mM DTT, 4 g/ml pepstatin, 0.2 mg/ml PMSF |
| Mlp2-PrA | Nup82   | YJL061W             | 10-3        | 0 mM               | 20 mM Na-Hepes, pH 7.4, 0.5 % Triton-X-100, 1 mM DTT, 4 g/ml pepstatin, 0.2 mg/ml PMSF |
| Mlp2-PrA | Nup84   | YDL116W             | 10-5        | 0 mM               | 20 mM Na-Hepes, pH 7.4, 0.5 % Triton-X-100, 1 mM DTT, 4 g/ml pepstatin, 0.2 mg/ml PMSF |
| Mlp2-PrA | Pdc1    | YLR044C             | 10-4        | 0 mM               | 20 mM Na-Hepes, pH 7.4, 0.5 % Triton-X-100, 1 mM DTT, 4 g/ml pepstatin, 0.2 mg/ml PMSF |
| Mlp2-PrA | Plk1    | YGR240C             | 10-2        | 0 mM               | 20 mM Na-Hepes, pH 7.4, 0.5 % Triton-X-100, 1 mM DTT, 4 g/ml pepstatin, 0.2 mg/ml PMSF |
| Mlp2-PrA | Rpl2b   | YIL018w             | 10-3        | 0 mM               | 20 mM Na-Hepes, pH 7.4, 0.5 % Triton-X-100, 1 mM DTT, 4 g/ml pepstatin, 0.2 mg/ml PMSF |
| Mlp2-PrA | Rps1b   | YML063W             | 10-8        | 0 mM               | 20 mM Na-Hepes, pH 7.4, 0.5 % Triton-X-100, 1 mM DTT, 4 g/ml pepstatin, 0.2 mg/ml PMSF |
| Mlp2-PrA | Rps5    | YJR123W             | 10-4        | 0 mM               | 20 mM Na-Hepes, pH 7.4, 0.5 % Triton-X-100, 1 mM DTT, 4 g/ml pepstatin, 0.2 mg/ml PMSF |
| Mlp2-PrA | Ssa2    | YLL024C             | 10-9        | 0 mM               | 20 mM Na-Hepes, pH 7.4, 0.5 % Triton-X-100, 1 mM DTT, 4 g/ml pepstatin, 0.2 mg/ml PMSF |
| Mlp2-PrA | Ssa2    | YLL024C             | 10-2        | 0 mM               | 20 mM Na-Hepes, pH 7.4, 0.5 % Triton-X-100, 1 mM DTT, 4 g/ml pepstatin, 0.2 mg/ml PMSF |
| Mlp2-PrA | Ssb1    | YDL229W             | 10-10       | 0 mM               | 20 mM Na-Hepes, pH 7.4, 0.5 % Triton-X-100, 1 mM DTT, 4 g/ml pepstatin, 0.2 mg/ml PMSF |
| Mlp2-PrA | Yef3    | YLR249W             | 10-3        | 0 mM               | 20 mM Na-Hepes, pH 7.4, 0.5 % Triton-X-100, 1 mM DTT, 4 g/ml pepstatin, 0.2 mg/ml PMSF |
| Mlp2-PrA | Yra1    | YDR381W             | 7.6X10-8    | 0 mM               | 20 mM Na-Hepes, pH 7.4, 0.5 % Triton-X-100, 1 mM DTT, 4 g/ml pepstatin, 0.2 mg/ml PMSF |
| Mlp2-PrA | Act1    | YFL039C             | 10-5        | 100 mM             | 20 mM Na-Hepes, pH 7.4, 0.5 % Triton-X-100, 1 mM DTT, 4 g/ml pepstatin, 0.2 mg/ml PMSF |
| Mlp2-PrA | Adh1    | YOL086C             | 10-7        | 100 mM             | 20 mM Na-Hepes, pH 7.4, 0.5 % Triton-X-100, 1 mM DTT, 4 g/ml pepstatin, 0.2 mg/ml PMSF |
| Mlp2-PrA | Fba1    | YKL060C             | 10-4        | 100 mM             | 20 mM Na-Hepes, pH 7.4, 0.5 % Triton-X-100, 1 mM DTT, 4 g/ml pepstatin, 0.2 mg/ml PMSF |
| Mlp2-PrA | Pdc1    | YLR044C             | 10-2        | 100 mM             | 20 mM Na-Hepes, pH 7.4, 0.5 % Triton-X-100, 1 mM DTT, 4 g/ml pepstatin, 0.2 mg/ml PMSF |
| Mlp2-PrA | Psa1    | YDL055C             | 10-2        | 100 mM             | 20 mM Na-Hepes, pH 7.4, 0.5 % Triton-X-100, 1 mM DTT, 4 g/ml pepstatin, 0.2 mg/ml PMSF |
| Mlp2-PrA | Seh1    | YGL100W             | 10-7        | 100 mM             | 20 mM Na-Hepes, pH 7.4, 0.5 % Triton-X-100, 1 mM DTT, 4 g/ml pepstatin, 0.2 mg/ml PMSF |
| Mlp2-PrA | Tdh1    | YJL052W             | 10-4        | 100 mM             | 20 mM Na-Hepes, pH 7.4, 0.5 % Triton-X-100, 1 mM DTT, 4 g/ml pepstatin, 0.2 mg/ml PMSF |
| Mlp2-PrA | Tdh3    | YGR192C             | 10-10       | 100 mM             | 20 mM Na-Hepes, pH 7.4, 0.5 % Triton-X-100, 1 mM DTT, 4 g/ml pepstatin, 0.2 mg/ml PMSF |
| Mlp2-PrA | Tef2    | YBR118W             | 10-4        | 100 mM             | 20 mM Na-Hepes, pH 7.4, 0.5 % Triton-X-100, 1 mM DTT, 4 g/ml pepstatin, 0.2 mg/ml PMSF |
| Mlp2-PrA | Bfa1    | YJR053W             | 10-2        | 150 mM             | 20 mM Na-Hepes, pH 7.4, 0.5 % Triton-X-100, 1 mM DTT, 4 g/ml pepstatin, 0.2 mg/ml PMSF |
| Mlp2-PrA | Mlp2    | Yil149c             | 10-2        | 150 mM             | 20 mM Na-Hepes, pH 7.4, 0.5 % Triton-X-100, 1 mM DTT, 4 g/ml pepstatin, 0.2 mg/ml PMSF |
| Mlp2-PrA | Mlp2    | Yil149c             | 10-2        | 150 mM             | 20 mM Na-Hepes, pH 7.4, 0.5 % Triton-X-100, 1 mM DTT, 4 g/ml pepstatin, 0.2 mg/ml PMSF |
| Mlp2-PrA | Mlp2    | YIL149C             | 10-5        | 150 mM             | 20 mM Na-Hepes, pH 7.4, 0.5 % Triton-X-100, 1 mM DTT, 4 g/ml pepstatin, 0.2 mg/ml PMSF |
| Mlp2-PrA | Mlp2    | Yil149c             | 10-5        | 150 mM             | 20 mM Na-Hepes, pH 7.4, 0.5 % Triton-X-100, 1 mM DTT, 4 g/ml pepstatin, 0.2 mg/ml PMSF |
| Mlp2-PrA | Nic96   | YFR002W             | 10-5        | 150 mM             | 20 mM Na-Hepes, pH 7.4, 0.5 % Triton-X-100, 1 mM DTT, 4 g/ml pepstatin, 0.2 mg/ml PMSF |
| Mlp2-PrA | Nsp1    | YJL041W             | 10-29       | 150 mM             | 20 mM Na-Hepes, pH 7.4, 0.5 % Triton-X-100, 1 mM DTT, 4 g/ml pepstatin, 0.2 mg/ml PMSF |
| Mlp2-PrA | Nup1    | YOR098C             | 10-5        | 150 mM             | 20 mM Na-Hepes, pH 7.4, 0.5 % Triton-X-100, 1 mM DTT, 4 g/ml pepstatin, 0.2 mg/ml PMSF |
| Mlp2-PrA | Nup133  | YKR082W             | 10-6        | 150 mM             | 20 mM Na-Hepes, pH 7.4, 0.5 % Triton-X-100, 1 mM DTT, 4 g/ml pepstatin, 0.2 mg/ml PMSF |
| Mlp2-PrA | Nup188  | YML103C             | 10-2        | 150 mM             | 20 mM Na-Hepes, pH 7.4, 0.5 % Triton-X-100, 1 mM DTT, 4 g/ml pepstatin, 0.2 mg/ml PMSF |
| Mlp2-PrA | Nup192  | YJL039C             | 10-3        | 150 mM             | 20 mM Na-Hepes, pH 7.4, 0.5 % Triton-X-100, 1 mM DTT, 4 g/ml pepstatin, 0.2 mg/ml PMSF |
| Mlp2-PrA | Sac3p   | YDR159W             | 10-3        | 150 mM             | 20 mM Na-Hepes, pH 7.4, 0.5 % Triton-X-100, 1 mM DTT, 4 g/ml pepstatin, 0.2 mg/ml PMSF |
| Mlp2-PrA | Spc110  | Ydr356w             | 10-9        | 150 mM             | 20 mM Na-Hepes, pH 7.4, 0.5 % Triton-X-100, 1 mM DTT, 4 g/ml pepstatin, 0.2 mg/ml PMSF |
| Mlp2-PrA | Spc110  | YDR356W             | 10-8        | 150 mM             | 20 mM Na-Hepes, pH 7.4, 0.5 % Triton-X-100, 1 mM DTT, 4 g/ml pepstatin, 0.2 mg/ml PMSF |
| Mlp2-PrA | Tsa1    | YML028W             | 10-5        | 150 mM             | 20 mM Na-Hepes, pH 7.4, 0.5 % Triton-X-100, 1 mM DTT, 4 g/ml pepstatin, 0.2 mg/ml PMSF |
| Mlp2-PrA | Yki056c | Yki056c             | 10-2        | 150 mM             | 20 mM Na-Hepes, pH 7.4, 0.5 % Triton-X-100, 1 mM DTT, 4 g/ml pepstatin, 0.2 mg/ml PMSF |
| Mlp2-PrA | Yki171w | Yki171w             | 10-2        | 150 mM             | 20 mM Na-Hepes, pH 7.4, 0.5 % Triton-X-100, 1 mM DTT, 4 g/ml pepstatin, 0.2 mg/ml PMSF |
| Mlp2-PrA | Cdc31   | YOR257W             | 10-11       | 200 mM             | 20 mM Na-Hepes, pH 7.4, 0.5 % Triton-X-100, 1 mM DTT, 4 g/ml pepstatin, 0.2 mg/ml PMSF |
| Mlp2-PrA | Nsp1    | YJL041W             | 10-3        | 200 mM             | 20 mM Na-Hepes, pH 7.4, 0.5 % Triton-X-100, 1 mM DTT, 4 g/ml pepstatin, 0.2 mg/ml PMSF |
| Mlp2-PrA | Nup188  | YML103C             | 10-3        | 200 mM             | 20 mM Na-Hepes, pH 7.4, 0.5 % Triton-X-100, 1 mM DTT, 4 g/ml pepstatin, 0.2 mg/ml PMSF |
| Mlp2-PrA | Nup192  | YJL039C             | 10-4        | 200 mM             | 20 mM Na-Hepes, pH 7.4, 0.5 % Triton-X-100, 1 mM DTT, 4 g/ml pepstatin, 0.2 mg/ml PMSF |
| Mlp2-PrA | Pom152  | YMR129W             | 10-9        | 200 mM             | 20 mM Na-Hepes, pH 7.4, 0.5 % Triton-X-100, 1 mM DTT, 4 g/ml pepstatin, 0.2 mg/ml PMSF |

Supplemental Table 2 - Proteins identified in gels shown in Figure 1C, 1D, and 1E

**Mlp1p-PrA**

| Band | NCBI-GI   | NAME               | MS (nr. peptides) | Sequence coverage (%) | MS score |
|------|-----------|--------------------|-------------------|-----------------------|----------|
| 1    | 6322948   | Mlp1p              | 66                | 40                    | 39.5     |
| 2    | 171959    | Mlp1p              | 48                | 33                    | 19.3     |
| 3    | 171959    | Mlp1p              | 51                | 32                    | 23.4     |
|      | 6323875   | Ese1               | 23                | 17                    | 9.1      |
| 4    | 172170    | photolyase         | 14                | 31                    | 1.7      |
|      | 171959    | Mlp1p              | 72                | 40                    | 36.4     |
| 5    | 6322948   | Mlp1p              | 45                | 25                    | 15.9     |
|      | 6322042   | Mlp2p              | 41                | 28                    | 14       |
| 6    | 6322076   | Nup159p            | 45                | 46                    | 37.1     |
| 7    | 6323533   | Nup188p            | 35                | 24                    | 19.5     |
|      | 6322421   | Nup192p            | 33                | 22                    | 19       |
| 8    | 6323777   | Pom152p            | 34                | 32                    | 18.8     |
|      | 6320952   | Nup157p            | 32                | 31                    | 17.8     |
|      | 6319392   | Nup170p            | 25                | 20                    | 13       |
|      | 6320363   | Sac3p              | 24                | 22                    | 8        |
|      | 6322421   | Nup192p            | 16                | 9                     | 4.3      |
| 9    | 6323533   | Nup188p            | 16                | 12                    | 1.7      |
|      | 6324672   | Nup1p              | 21                | 26                    | 25.2     |
|      | 6322935   | Nup133p            | 26                | 20                    | 23.4     |
| 10   | 6323691   | Nup116             | 7                 | 9                     | 1.9      |
|      | 6322935   | Nup133             | 28                | 24                    | 22.5     |
| 11   | 6323691   | Nup116             | 14                | 16                    | 7.4      |
|      | 6322793   | Nup120p            | 23                | 20                    | 23.3     |
| 12   | 6322782   | Nup100p            | 9                 | 15                    | 8        |
|      | 14318524  | Nie96              | 33                | 37                    | 47.7     |
|      | 6322420   | Nsp1               | 29                | 48                    | 40.2     |
|      | 6323367   | Nup2               | 18                | 38                    | 24       |
| 13   | 6323379   | Kap95              | 9                 | 13                    | 11.9     |
|      | 14318558  | Qcr6               | 4                 | 43                    | 3.2      |
|      | 6321346   | Nup145C            | 23                | 18                    | 13.6     |
| 14   | 6320087   | Nup84              | 17                | 28                    | 12       |
|      | 6322502   | Nup85              | 16                | 24                    | 11.6     |
|      | 172054    | Nsp1               | 17                | 32                    | 9.7      |
|      | 6322400   | Nup82              | 15                | 24                    | 6.1      |
| 15   | 6319318   | Nup60p             | 13                | 36                    | 4.6      |
|      | 6321346   | Nup145N            | 13                | 12                    | 4        |
| 16   | 6325088   | Mex67p             | 14                | 31                    | 24.3     |
|      | 6319318   | Nup60p             | 13                | 31                    | 15.2     |
|      | 732941    | Asm4               | 5                 | 10                    | 6.8      |
| 17   | 1945327   | Nup57              | 9                 | 16                    | 6.4      |
|      | 58177142  | Kap60              | 10                | 23                    | 5.3      |
|      | 6320115   | Asm4               | 8                 | 22                    | 4        |
| 18   | 6322815   | Ugp1p              | 8                 | 18                    | 4.1      |
|      | 6324620   | Dbp5p              | 7                 | 18                    | 2.5      |
| 19   | 6321266   | Nup49              | 9                 | 17                    | 9.5      |
|      | 32693293  | Tef1               | 9                 | 33                    | 6.1      |
| 20   | 32693293  | Tef1               | 11                | 27                    | 11.5     |
|      | 6324500   | Thp1p              | 10                | 23                    | 11       |
|      | 6320137   | Ildp1p             | 7                 | 15                    | 3.2      |
| 21   | 6321338   | Sch1p              | 9                 | 25                    | 10.2     |
|      | 6320954   | Gle2p              | 5                 | 19                    | 4        |
| 22   | 49258842  | DchamD sordarin    | 6                 | 28                    | 6.5      |
|      | 50882584  | Yhr131cp           | 6                 | 9                     | 4        |
| 23   | 6321631   | Tdh3               | 10                | 32                    | 7.9      |
|      | 45269784  | YLR018C            | 5                 | 20                    | 3.8      |
| 24   | 6323237   | Sec13p             | 15                | 43                    | 18.6     |
| 25   | 6320589   | Yra1p              | 7                 | 25                    | 7.1      |
| 26   | 6325058   | Rpl7bp             | 4                 | 16                    | 1        |
| 27   | 1370295   | glutamate synthase | 9                 | 4                     | 2.4      |
| 28   | 110590423 | Cdc31              | 5                 | 24                    | 4.8      |
|      | 110590423 | Cdc31              | 8                 | 35                    | 16.9     |
| 29   | 6320918   | Rps24ap            | 8                 | 41                    | 13.9     |
|      | 49258832  | MchainM sordarin   | 5                 | 36                    | 6.6      |
|      | 49258830  | KchainK sordarin   | 6                 | 38                    | 5.6      |
|      | 171031    | histone H2A-1      | 3                 | 33                    | 2.9      |
| 30   | 6319424   | Ede1p              | 8                 | 4                     | 8.4      |
| 31   | 6324485   | YOL087cp           | 4                 | 5                     | 1.9      |
| 32   | 6320632   | Dyn2p              | 4                 | 44                    | 2.1      |

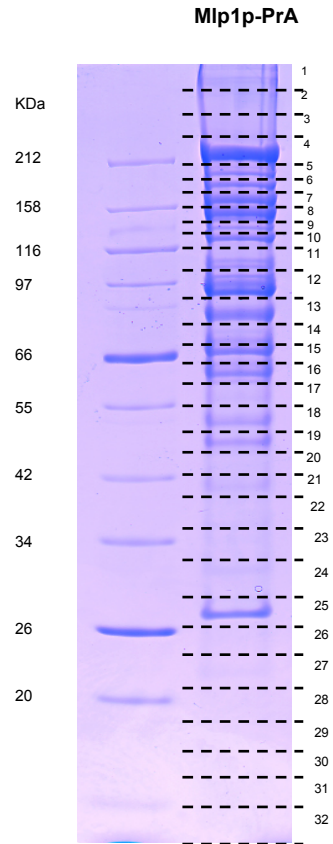

**Mlp2p-PrA**

| Band | NCBI-GI   | NAME       | MS (nr. peptides) | Sequence coverage (%) | MS score |
|------|-----------|------------|-------------------|-----------------------|----------|
| 1    | 6322042   | Mlp2       | 8                 | 7                     | 7.2      |
| 2    | 6319317   | Tfc3p      | 3                 | 1                     | 2.3      |
| 3    | 6322042   | Mlp2       | 16                | 13                    | 7.6      |
|      | 6320952   | Nup157     | 11                | 11                    | 3.3      |
| 4    | 6322042   | Mlp2p      | 44                | 29                    | 24.7     |
|      | 6322421   | Nup192p    | 15                | 11                    | 4.2      |
|      | 6322076   | Nup159p    | 27                | 32                    | 17       |
| 6    |           | N/A        |                   |                       |          |
| 7    | 6320952   | Nup157p    | 21                | 22                    | 10       |
|      | 6323777   | Pom152p    | 20                | 20                    | 10.5     |
|      | 6322935   | Nup133p    | 19                | 22                    | 12.7     |
| 8    | 6322793   | Nup120p    | 15                | 14                    | 8.3      |
|      | 395232    | Nic96p     | 21                | 31                    | 19.4     |
|      | 6323367   | Nup2p      | 19                | 47                    | 15.3     |
|      | 6322177   | Pdr11      | 15                | 10                    | 4.3      |
|      | 55670150  | A chain A  | 10                | 19                    | 2.6      |
|      | 6319594   | Tef2       | 8                 | 29                    | 1.9      |
| 9    | 395232    | Nic96p     | 15                | 23                    | 13.2     |
|      | 172054    | Nsp1p      | 14                | 31                    | 9.5      |
|      | 6322502   | Nup85p     | 12                | 17                    | 5.1      |
| 10   | 496731    | Nup145C    | 12                | 11                    | 4.4      |
|      | 6323004   | Ssa1       | 14                | 33                    | 5.9      |
|      | 6325088   | Mex67      | 10                | 31                    | 2.2      |
| 11   | 6325088   | Mex67p     | 12                | 25                    | 10       |
|      | 732941    | Nup59p     | 10                | 28                    | 8.3      |
|      | 6319972   | Ssb1       | 9                 | 21                    | 6.6      |
|      | 7546348   | A Chain A  | 7                 | 32                    | 5.5      |
|      | 6323073   | Pdc1       | 8                 | 23                    | 5.3      |
|      | 6322744   | Ykl105cp   | 12                | 11                    | 5        |
| 12   | 6319279   | Cdc19p     | 8                 | 18                    | 5.6      |
| 13   | 7839210   | Ypr158c-cp | 5                 | 21                    | 0.5      |
| 14   | 230846    | Enolase    | 7                 | 27                    | 3.2      |
|      | 6319594   | Tef2p      | 5                 | 20                    | 2.4      |
| 15   | 6322381   | Scp160p    | 8                 | 6                     | 1.7      |
| 16   | 4109      | Pdc1p      | 7                 | 25                    | 7.1      |
|      | 112491285 | Adh1p      | 5                 | 26                    | 5.1      |
|      | 6321631   | Tdh3p      | 9                 | 55                    | 13       |
| 17   | 6319441   | Pet9       | 4                 | 12                    | 3.1      |
|      | 55670021  | Rack1      | 5                 | 38                    | 4.7      |
|      | 6325126   | Rpl5       | 6                 | 27                    | 5.4      |
|      | 6323371   | Rpp0p      | 9                 | 32                    | 12.1     |
| 18   | 6323237   | Sec13p     | 7                 | 39                    | 6.7      |
|      | 6321997   | Rps4bp     | 5                 | 29                    | 4.2      |
| 19   | 2624630   | PG mutase  | 6                 | 44                    | 5.1      |
|      | 6325058   | Rpl7bp     | 6                 | 37                    | 4.8      |
| 20   | 6323104   | Rpl10p     | 6                 | 25                    | 1.9      |
| 21   | 1164943   | YOR3177w   | 5                 | 41                    | 3.2      |
|      | 6320562   | Spe110     | 9                 | 11                    | 6.1      |
| 22   | 6323863   | hfa1p      | 5                 | 4                     | 0.7      |
| 23   | 6323915   | Ymr259cp   | 11                | 15                    | 2.4      |
| 24   | 71081935  | TAO3p      | 8                 | 4                     | 2.9      |

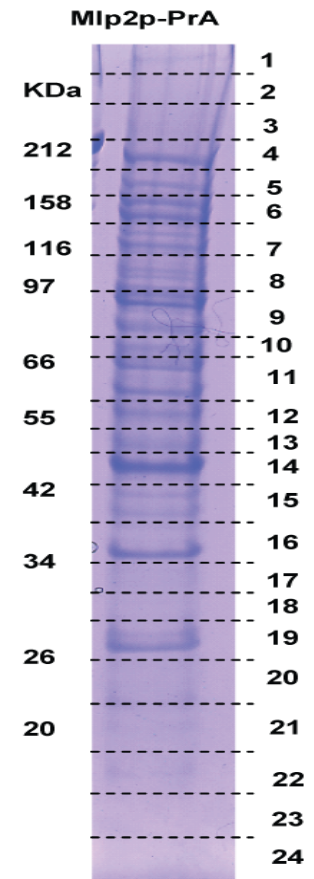

**Esc1p-PrA**

| Band | NCBI-GI   | NAME               | MS (nr. peptides) | Sequence coverage (%) | MS score |
|------|-----------|--------------------|-------------------|-----------------------|----------|
| 1    | 6323462   | Sen1p              | 12                | 7                     | 0.8      |
|      | 6322042   | Mlp2p              | 24                | 14                    | 10       |
| 2    | 224905    | ATPase             | 11                | 16                    | 7        |
|      | 6323875   | Esc1p              | 11                | 8                     | 4.7      |
| 3    | 6323875   | Esc1p              | 32                | 30                    | 35.4     |
|      | 6321430   | Pma1p              | 10                | 16                    | 9.8      |
|      | 6323628   | Sel1p              | 5                 | 7                     | 2.7      |
| 4    | 6323875   | Esc1p              | 47                | 40                    | 49.1     |
|      | 6321757   | Ecm29p             | 41                | 27                    | 23.8     |
| 5    | 6322042   | Mlp2p              | 38                | 26                    | 15       |
|      | 6323875   | Esc1p              | 33                | 28                    | 15.3     |
|      | 854566    | carbamy1 p.s.      | 24                | 13                    | 2        |
|      | 6322421   | Nup192p            | 19                | 10                    | 5.3      |
| 6    | 6320433   | Sir4p              | 19                | 18                    | 6.8      |
|      | 6323875   | Esc1p              | 17                | 16.2                  | 6.1      |
|      | 7839207   | Ypr137c-bp         | 18                | 15                    | 6        |
|      | 6323875   | Esc1p              | 20                | 16                    | 10.4     |
| 7    | 6322163   | Irr1p              | 12                | 17                    | 3.8      |
|      | 1360355   | TY1B               | 15                | 9                     | 2.1      |
|      | 119180    | EF-3A              | 17                | 22                    | 9.7      |
| 8    | 4246      | PSE-1              | 11                | 18                    | 4        |
|      | 51013765  | YLR442C            | 11                | 14                    | 3.3      |
|      | 887600    | unknown            | 12                | 18                    | 3.3      |
|      | 6321816   | Rpn1p              | 30                | 39                    | 34.8     |
| 9    | 4246      | PSE-1              | 12                | 18                    | 8.1      |
|      | 6319558   | Mis1p              | 11                | 20                    | 6.9      |
|      | 6321643   | Ade1p              | 11                | 21                    | 5.1      |
|      | 6322115   | Rpn2p              | 36                | 45                    | 34.8     |
| 10   | 55670150  | A Chain A          | 19                | 31                    | 13.4     |
|      | 6323606   | Amd1p              | 15                | 29                    | 11.2     |
|      | 171723    | hsc82              | 14                | 23                    | 9.4      |
|      | 6322420   | Nsp1p              | 11                | 24                    | 7.6      |
| 11   | 6320936   | Met6p              | 13                | 17                    | 5.2      |
|      | 71064052  | Rom1p              | 8                 | 15                    | 1.9      |
|      | 417149    | SSA1               | 19                | 47                    | 19.7     |
| 12   | 6322771   | Smy1p              | 10                | 20                    | 4        |
|      | 6319972   | Ssb1p              | 18                | 40                    | 22.3     |
| 13   | 6323004   | Ssa2p              | 8                 | 15                    | 9.3      |
|      | 6324778   | Ded1p              | 5                 | 16                    | 3.6      |
|      | 6323073   | Pdc1p              | 18                | 51                    | 20.2     |
| 14   | 6319279   | Cdc19p             | 12                | 25                    | 10.4     |
|      | 171122    | vacuole H AIPase   | 9                 | 25                    | 2.4      |
|      | 110282990 | RPN3               | 19                | 41                    | 17.7     |
|      | 6322734   | Rpt1p              | 14                | 29                    | 10.9     |
| 15   | 6322815   | Ugp1p              | 13                | 35                    | 6.1      |
|      | 6319279   | Cdc19p             | 11                | 24                    | 5.9      |
|      | 15826394  | Lipo Dehydrogenase | 11                | 32                    | 4.6      |
|      | 6324258   | Lat1p              | 9                 | 25                    | 3        |
|      | 6320602   | Rpt3p              | 17                | 63                    | 17.3     |
|      | 6324691   | Rpt5p              | 15                | 47                    | 11.4     |
| 16   | 557599    | ATPase             | 13                | 43                    | 8.4      |
|      | 6319594   | Tef2p              | 15                | 48                    | 8.8      |
|      | 6320054   | Rpn3p              | 14                | 37                    | 6.2      |
|      | 6323087   | Shm2p              | 10                | 32                    | 2.1      |
|      | 1147800   | Sug2p              | 11                | 39                    | 4.3      |
|      | 6319594   | Tef2p              | 18                | 48                    | 18.5     |
|      | 6320137   | Idp1p              | 17                | 60                    | 21.5     |
| 17   | 228885    | SUG1               | 13                | 29                    | 13.1     |
|      | 1633520   | PG Kinase          | 10                | 37                    | 6.9      |
|      | 6321968   | Eno2p              | 11                | 31                    | 6.4      |
|      | 6325365   | Rpn7p              | 10                | 29                    | 9.7      |
|      | 6320106   | Rpn6p              | 8                 | 32                    | 3        |
|      | 37362644  | Pda1p              | 20                | 57                    | 31.9     |
|      | 49258841  | C Chain C...       | 13                | 31                    | 13.2     |
| 18   | 6320635   | Rpn9p              | 9                 | 31                    | 13.2     |
|      | 228885    | SUG1               | 7                 | 22                    | 5.2      |
|      | 6324835   | Rpn8p              | 7                 | 38                    | 3.8      |
|      | 1633520   | PG Kinase          | 6                 | 27                    | 2.7      |
|      | 6320635   | Rpn9p              | 16                | 46                    | 21.7     |
| 19   | 6324321   | Sis1p              | 9                 | 37                    | 13       |
|      | 49258842  | D Chain D...       | 9                 | 37                    | 10.4     |
|      | 6324835   | Rpn8p              | 10                | 49                    | 12.7     |
|      | 6322790   | Fba1p              | 9                 | 33                    | 6.7      |
|      | 31581432  | actin              | 6                 | 35                    | 5.6      |
|      | 3720      | G3PD               | 5                 | 28                    | 3.1      |
|      | 957238    | Ilv5x              | 6                 | 24                    | 2.3      |
|      | 6319698   | Pdb1p              | 15                | 69                    | 25.3     |
| 20   | 6321631   | Tdh3p              | 15                | 55                    | 19.8     |
|      | 112491285 | YAD I              | 11                | 49                    | 14       |
|      | 14318526  | Rpn11p             | 11                | 36                    | 13.5     |
|      | 6321216   | Ede1p              | 6                 | 35                    | 3.4      |
|      | 55670021  | Rack1              | 12                | 72                    | 14.2     |
| 21   | 14318526  | Rpn11p             | 11                | 35                    | 10.6     |
|      | 6323371   | Rpp0p              | 9                 | 37                    | 8.9      |
|      | 6325126   | Rpl5p              | 8                 | 47                    | 5.9      |
|      | 13787035  | Pyrophosphatase    | 9                 | 43                    | 4        |

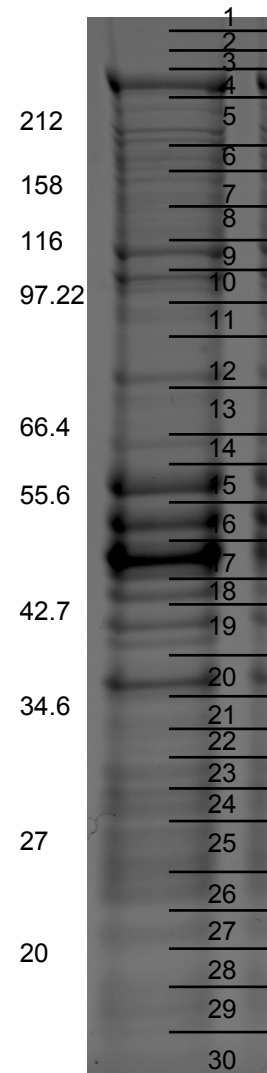



|         |                     |                         |    |     |      |
|---------|---------------------|-------------------------|----|-----|------|
| 22      | 6321994             | Rpn10p                  | 11 | 61  | 19.9 |
|         | 14318577            | Rpn12p                  | 10 | 45  | 14.8 |
|         | 6319441             | Pet9p                   | 8  | 24  | 7    |
|         | 6322537             | Mir1p                   | 5  | 15  | 3.8  |
| 23      | 6323577             | Rps1bp                  | 15 | 48  | 12.2 |
|         | 6321997             | Rps4bp                  | 12 | 39  | 9    |
|         | 14318577            | Rpn12p                  | 10 | 50  | 5.1  |
|         | 49258840            | B Chain B               | 11 | 49  | 4.6  |
|         | 172444              | ribo L4                 | 9  | 34  | 2.4  |
| 24      | 2624630             | phosphoglycerate mutase | 8  | 41  | 18   |
|         | 3114269             | AchA 20S proteasome     | 9  | 41  | 14.5 |
|         | 49258840            | BchB ribo               | 9  | 33  | 11.9 |
|         | 6323077             | Rps0bp                  | 6  | 44  | 9    |
|         | 49258844            | FchF Ribo               | 6  | 25  | 8.8  |
|         | 230405              | isomerase               | 4  | 18  | 3.7  |
| 3114271 | CchC 20S proteasome | 4                       | 26 | 2.7 |      |
| 26      | 6323567             | Rpl6ap                  | 9  | 46  | 6    |
|         | 49258852            | NchN ribo               | 9  | 50  | 5.2  |
|         | 6324670             | Rps7ap                  | 7  | 49  | 3.9  |
| 25      | 3114269             | A Chain A 20S           | 10 | 41  | 17.8 |
|         | 2624630             | A Chain A PGM           | 8  | 41  | 18   |
|         | 6324151             | Rps3p                   | 9  | 47  | 16.1 |
|         | 6321653             | Rps0ap                  | 6  | 44  | 8.9  |
|         | 49258844            | F Chain F ribo          | 6  | 25  | 8.8  |
|         | 49258840            | B Chain B ribo          | 6  | 33  | 8.2  |
|         | 230405              | isomerase               | 4  | 18  | 3.7  |
|         | 3114271             | C Chain C 20S           | 4  | 26  | 2.6  |
| 27      | 6324888             | Rpl20bp                 | 11 | 47  | 12.7 |
|         | 3114271             | Tsa1p                   | 8  | 43  | 5.2  |
|         | 3114271             | Ahp1p                   | 5  | 42  | 3.4  |
| 28      | 71081919            | TAO3p                   | 14 | 6   | 1.3  |
| 29      | 6320658             | Rps18ap                 | 7  | 52  | 7.7  |
|         | 6321786             | Rpl14bp                 | 8  | 35  | 6    |
|         | 6320269             | Rps13p                  | 6  | 41  | 5.5  |
|         | 6320679             | Rpl27bp                 | 6  | 35  | 5.1  |
|         | 6321772             | Rps20p                  | 5  | 45  | 3.1  |
|         | 6320655             | Rps17bp                 | 5  | 31  | 2.6  |
| 30      | 547604              | rp59                    | 10 | 63  | 12.4 |
|         | 6320918             | rps24ap                 | 6  | 35  | 2.2  |



Supplemental Table 3 - Proteins identified in gels shown in Figure 2A

**Mlp1p-PrA, nup84Δ**

| Band | NCBI-GI | NAME                     | MS (nr. peptides) | Sequence coverage (%) | Xproteo score |
|------|---------|--------------------------|-------------------|-----------------------|---------------|
| 1    | 171959  | Mlp1p                    | 25                | 16.3                  | 28.9          |
| 2    | 171959  | Mlp1p                    | 39                | 28                    | 46.2          |
| 3    | 6322948 | Mlp1p                    | 50                | 29                    | 60.1          |
| 4    | 171959  | Mlp1p                    | 54                | 33                    | 55.1          |
| 5    | 171959  | Mlp1p                    | 40                | 28                    | 32.4          |
| 6    | 6322042 | Mlp2p                    | 23                | 21                    | 8.8           |
| 7    | 171959  | Mlp1p                    | 19                | 14                    | 23.5          |
| 8    | 171959  | Mlp1p                    | 23                | 16                    | 18.6          |
| 9    | 395232  | Nic96p                   | 8                 | 12                    | 7.2           |
| 10   | 171959  | Mlp1p                    | 8                 | 4                     | 2             |
| 11   | 417149  | Ssa1p                    | 11                | 20                    | 16.2          |
| 12   | 6325088 | Mex67p                   | 5                 | 16                    | 5.1           |
| 13   | 6324804 | Wtm1p                    | 12                | 42                    | 9             |
| 14   | 6319594 | Tef2p                    | 12                | 35                    | 14.6          |
| 15   | 6322434 | Rnr2p                    | 8                 | 28                    | 9.8           |
| 16   | 6321619 | Rnr4p                    | 10                | 34                    | 12.4          |
| 17   | 3328    | actin                    | 4                 | 18                    | 2.8           |
| 18   | 83137   | acetolactate synth       | 4                 | 33                    | 2.1           |
| 19   | 6320589 | Yra1p                    | 9                 | 21                    | 10.1          |
| 20   | 6321919 | Yhr127wp                 | 4                 | 17                    | 4             |
| 21   | 472525  | Synthetic Lethal 9       | 9                 | 9                     | 4.1           |
| 22   | 1209387 | GDP-GTP exchange protein | 3                 | 3                     | 0.8           |
| 23   | 2131277 | Hfim1p                   | 5                 | 8                     | 3.2           |
| 24   | 6322590 | Str2p                    | 3                 | 6                     | 3.3           |
| 25   | 2447041 | Ppf3p                    | 10                | 8                     | 2.4           |

**Mlp1p-PrA; Δnup84p**

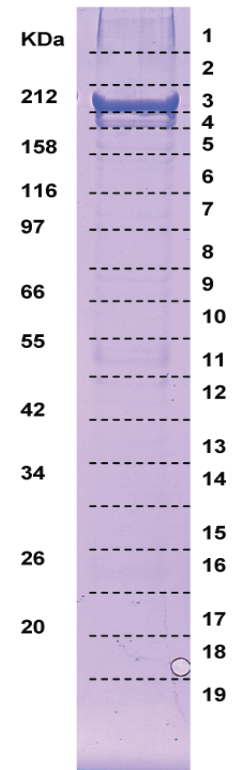

**Mlp1p-PrA, nup60Δ**

| Band | NCBI-GI  | NAME            | MS (nr. peptides) | Sequence coverage (%) | Xproteo score |
|------|----------|-----------------|-------------------|-----------------------|---------------|
| 1    | 6322948  | Mlp1p           | 15                | 9                     | 9.9           |
| 2    | 171959   | Mlp1p           | 7                 | 5                     | 6.3           |
| 3    | 6322948  | Mlp1p           | 11                | 10                    | 10.4          |
| 4    |          |                 |                   |                       |               |
| 5    | 6322190  | Yil001wp        | 3                 | 7.4                   | 3.9           |
| 6    |          |                 |                   |                       |               |
| 7    | 6319317  | Tfc3p           | 2                 | 1.4                   | 0.2           |
| 8    | 171959   | Mlp1p           | 10                | 7.1                   | 1.9           |
| 9    |          |                 |                   |                       |               |
| 10   | 171959   | Mlp1            | 21                | 8                     | 1.8           |
| 11   | 71064089 | tao3p           | 5                 | 2.9                   | 1             |
| 12   | 472525   | synth lethal 39 | 9                 | 6.6                   | 1.4           |
| 13   | 6322500  | gef1p           | 3                 | 6.5                   | 1.9           |
| 14   | 6324820  | yor246cp        | 4                 | 19                    | 0.4           |
| 15   | 6322392  | utp18p          | 4                 | 14                    | 1.3           |
| 16   | 6320979  | pmd1p           | 8                 | 8                     | 4.8           |
| 17   |          |                 |                   |                       |               |
| 18   | 6323933  | fcplp           | 3                 | 8                     | 1.9           |
| 19   | 6324022  | mck1p           | 3                 | 14                    | 1.9           |
| 20   | 6320337  | ydr132cp        | 2                 | 10                    | 0.8           |

**Mlp1p-PrA; Δnup60p**

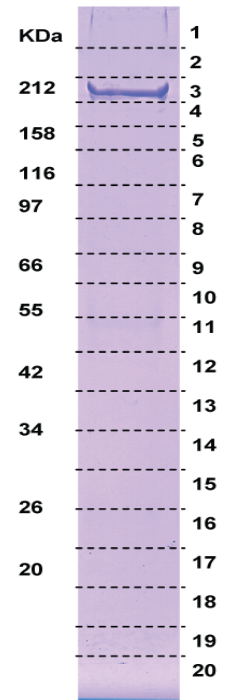

**Mlp1p-PrA, nup1Δ**

| Band | NCBI-GI  | NAME                   | MS (nr. peptides) | Sequence coverage (%) | Xproteo score |
|------|----------|------------------------|-------------------|-----------------------|---------------|
| 1    | 171959   | Mlp1                   | 22                | 14                    | 12.5          |
| 2    | 171959   | Mlp1                   | 18                | 10                    | 10.7          |
| 3    | 171959   | Mlp1                   | 11                | 7                     | 5.5           |
| 4    | 171959   | Mlp1                   | 26                | 14                    | 18.5          |
|      | 71064042 | Rsc1                   | 9                 | 10                    | 2.6           |
| 5    | 171959   | Mlp1                   | 56                | 25                    | 28.8          |
| 6    | 171959   | Mlp1                   | 30                | 18                    | 15.7          |
| 7    | 171959   | Mlp1                   | 11                | 6                     | 11.8          |
| 8    | 171959   | Mlp1                   | 16                | 8                     | 2.4           |
| 9    | 171959   | Mlp1                   | 11                | 6                     | 4.9           |
| 10   | 171959   | Mlp1                   | 12                | 7                     | 4.8           |
| 11   | 171959   | Mlp1                   | 7                 | 4                     | 2.2           |
| 12   | 171959   | Mlp1                   | 14                | 7                     | 2.6           |
| 13   | 171959   | Mlp1                   | 12                | 7                     | 2.7           |
| 14   | 171959   | Mlp1                   | 11                | 5                     | 4.1           |
| 15   | 6320243  | Ena5                   | 5                 | 5                     | 1.7           |
| 16   | 6320087  | Nup84                  | 14                | 26                    | 11            |
|      | 6322400  | Nup82                  | 13                | 23                    | 8.7           |
|      | 172054   | Nsp1                   | 11                | 17                    | 7             |
|      | 6321346  | Nup145                 | 14                | 13                    | 6.1           |
|      | 1019944  | Nup85                  | 8                 | 12                    | 2.3           |
| 17   | 6324310  | YNL018C                | 3                 | 9                     | 0.8           |
| 18   |          |                        |                   |                       |               |
| 19   | 6320589  | Yra1                   | 3                 | 15                    | 1.7           |
| 20   | 6320979  | Pmd1                   | 8                 | 7                     | 1.8           |
| 21   | 6322966  | Mht1                   | 2                 | 7                     | 6.6           |
| 22   | 33578048 | YKL068-ap              | 1                 | 18                    | 5.5           |
| 23   | 47169395 | Acetyl CoA carboxylase | 5                 | 8                     | 4.1           |
| 24   | 6320333  | YDR128wp               | 5                 | 6                     | 1.4           |
| 25   | 6320979  | Pmd1                   | 5                 | 5                     | 2.5           |
| 26   | 6320979  | Pmd1                   | 3                 | 3                     | 0.8           |

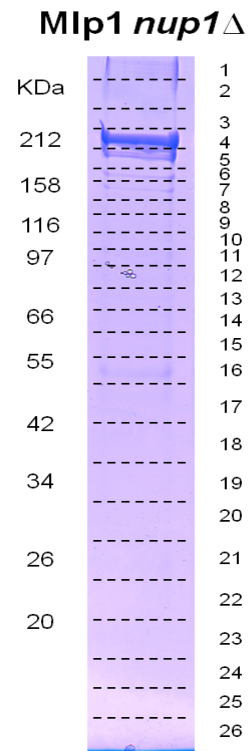

Supplemental Table 4 - Proteins identified in gels shown in Figure 2B

**Mlp2p-PrA, nup84Δ**

| Band | NCBI-GI   | NAME                        | MS (nr. peptides) | Sequence coverage (%) | Xproteo score |
|------|-----------|-----------------------------|-------------------|-----------------------|---------------|
| 1    | 6322042   | Mlp2                        | 45                | 28                    | 36.1          |
| 2    | 6322042   | Mlp2                        | 29                | 22                    | 20.5          |
| 3    | 171959    | Mlp1                        | 6                 | 5                     | 4.2           |
| 4    | 6322042   | Mlp2                        | 7                 | 10                    | 5             |
| 5    | 854598    | ORF YJR8318                 | 1                 | 6                     | 3.4           |
| 6    | 114794808 | EF3                         | 5                 | 11                    | 2.1           |
| 7    | 14318524  | Nic96                       | 15                | 16                    | 9.5           |
|      | 6320593   | Eft2                        | 11                | 21                    | 7.1           |
| 8    | 6322420   | Nsp1                        | 15                | 34                    | 10.6          |
|      | 171723    | Hsc82                       | 9                 | 15                    | 4.5           |
| 9    | 6323004   | Ssa2                        | 12                | 26                    | 20.7          |
|      | 6324120   | Ssb2                        | 10                | 22                    | 15.5          |
|      | 1301810   | unknown                     | 3                 | 29                    | 2.9           |
| 10   | 6323073   | Pdc1                        | 13                | 44                    | 16            |
|      | 6323226   | Sik1                        | 6                 | 20                    | 3.6           |
| 11   | 6319279   | Cdc19                       | 15                | 38                    | 14.8          |
|      | 171122    | H+ ATPase                   | 8                 | 24                    | 3.8           |
| 12   | 32693297  | Tef1                        | 12                | 37                    | 14.5          |
|      | 6321968   | Eno2                        | 8                 | 33                    | 5.4           |
| 13   | 1633520   | PgkP72                      | 14                | 50                    | 9.3           |
|      | 32693297  | Tef1                        | 10                | 32                    | 5.1           |
| 14   | 49258842  | DchainD RiboEef2Sordarin    | 7                 | 32                    | 7.8           |
|      | 6321631   | Tdh3                        | 9                 | 55                    | 10.1          |
| 15   | 112491285 | Yeast Alcohol Dehydrogenase | 8                 | 28                    | 8.3           |
|      | 6323371   | Rpp0                        | 6                 | 19                    | 2.2           |
| 16   | 596086    | YL6b                        | 4                 | 38                    | 5.1           |
|      | 6321997   | Rps4bp                      | 3                 | 12                    | 2.9           |
| 17   | 2624630   | PG Mutase                   | 12                | 48                    | 13.2          |
|      | 6322583   | Rps5p                       | 7                 | 34                    | 2.1           |
| 18   | 1084771   | L18a.e.c13                  | 8                 | 38                    | 1.2           |
| 19   | 6320679   | Rp127bp                     | 3                 | 23                    | 3             |
|      | 6320269   | Rps13p                      | 3                 | 20                    | 2.8           |
| 20   | 49258830  | KchainK RiboEef2Sordarin    | 5                 | 45                    | 1.3           |
| 21   | 6321265   | Kem1p                       | 10                | 10                    | 4.2           |

**Mlp2p-PrA; Δnup84p**

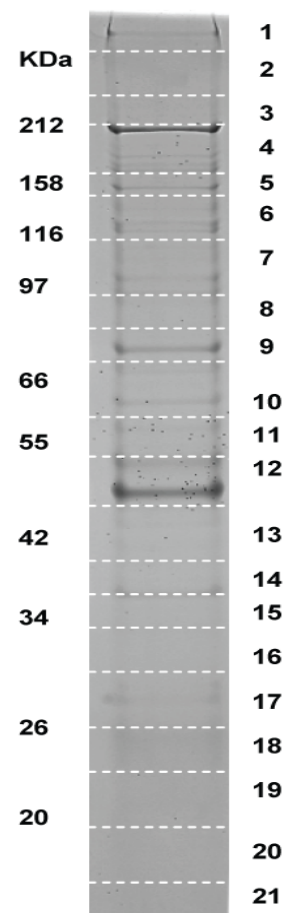

**Mlp2p-PrA, nup60Δ**

| Band | NCBI-GI  | NAME                 | MS (nr. peptides) | Sequence coverage (%) | Xproteo score |
|------|----------|----------------------|-------------------|-----------------------|---------------|
| 1    | 6322042  | Mlp2                 | 9                 | 6                     | 11.6          |
| 2    | 6322062  | TAO3p                | 5                 | 3                     | 2.1           |
| 3    | 6321194  | Tad3p                | 4                 | 16                    | 1.6           |
| 4    | 6322948  | Mlp1                 | 27                | 17                    | 13.3          |
|      | 6322042  | Mlp2                 | 22                | 18                    | 11.4          |
| 5    | 6322042  | Mlp2                 | 17                | 17                    | 13.9          |
|      | 224905   | ATPase               | 7                 | 14                    | 4.9           |
| 6    | 71081933 | TAO3p                | 9                 | 5                     | 2.7           |
| 7    | 6321243  | Gen1                 | 11                | 5                     | 1.7           |
| 8    | 42543756 | A Chain α Hsp90/Aha1 | 6                 | 13                    | 2.9           |
| 9    | 6323004  | Ssa2                 | 6                 | 17                    | 7.4           |
| 10   | 6321631  | Tdh3                 | 4                 | 25                    | 1.4           |
| 11   | 6319279  | Cdc19                | 6                 | 12                    | 2.2           |
| 12   | 6324804  | Wtm1                 | 4                 | 11                    | 1.4           |
| 13   | 6321968  | Eno2                 | 10                | 33                    | 9             |
|      | 6322434  | Rnr2                 | 9                 | 26                    | 9.1           |
|      | 32693293 | Tef1                 | 7                 | 27                    | 6.3           |
|      | 1633520  | PG Kinase            | 6                 | 22                    | 3             |
| 14   | 6324280  | Alg11                | 6                 | 11                    | 2.1           |
|      | 49258842 | D Chain D sordarin   | 6                 | 30                    | 6.1           |
| 15   | 3328     | actin                | 5                 | 22                    | 3.6           |
|      | 6322062  | TAO3p                | 32                | 16                    | 6.8           |
| 16   | 6323371  | Rpp0p                | 8                 | 29                    | 7             |
| 17   | 2624630  | A Ch A PG Mutase     | 6                 | 22                    | 8.8           |
| 18   | 6325172  | Sec16                | 6                 | 5                     | 4             |
| 19   | 51013057 | YHR158C              | 7                 | 8                     | 2.3           |
| 20   | 71081919 | TAO3p                | 4                 | 3                     | 2.2           |
| 21   | 6321872  | YHR080cp             | 4                 | 5                     | 2.1           |

**Mlp2p-PrA; Δnup60p**

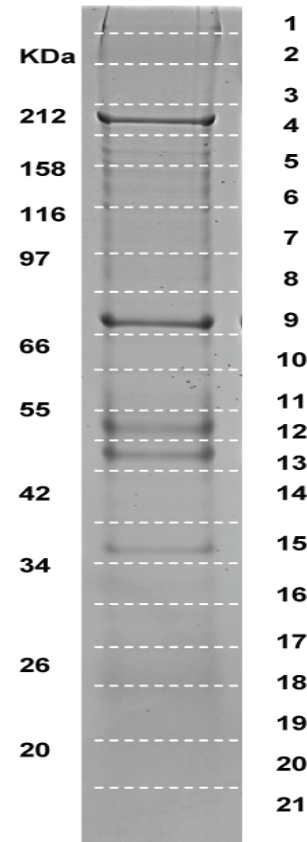

**Mlp2p-PrA, nup1Δ**

| Band | NCBI-GI   | NAME                       | MS (nr. peptides) | Sequence coverage (%) | Xproteo score |
|------|-----------|----------------------------|-------------------|-----------------------|---------------|
| 1    | 6322042   | Mlp2                       | 26                | 21                    | 17.4          |
|      | 6321430   | Pma1                       | 8                 | 16                    | 2.2           |
| 2    | 6322042   | Mlp2                       | 13                | 15                    | 7.5           |
| 3    | 6322042   | Mlp2                       | 23                | 18                    | 11.3          |
|      | 6321430   | ATPase                     | 9                 | 14                    | 1.9           |
| 4    | 6322042   | Mlp2                       | 22                | 13                    | 24.5          |
| 5    | 1945331   | TY1B                       | 15                | 9                     | 5.9           |
|      | 6320952   | Nup157                     | 9                 | 10                    | 3.4           |
|      | 6319594   | Tef2                       | 7                 | 14                    | 2.1           |
| 6    | 114794808 | Elongation factor          | 6                 | 18                    | 2.2           |
| 7    | 55670150  | Ribosomal Translocase      | 13                | 20                    | 15.3          |
|      | 395232    | Nic96                      | 12                | 12                    | 8             |
|      | 32693293  | Tef1                       | 5                 | 19                    | 2.7           |
| 8    | 171723    | Hsc82                      | 16                | 25                    | 10.7          |
| 9    | 6323004   | Ssa2                       | 13                | 30                    | 6.9           |
| 10   | 6323073   | Pdc1p                      | 10                | 31                    | 6.9           |
|      | 6319972   | Ssb1p                      | 10                | 25                    | 6.5           |
| 11   | 6319279   | Cdc19                      | 10                | 27                    | 13.3          |
|      | 6319673   | Pgi1                       | 5                 | 20                    | 2.5           |
| 12   | 32693293  | Tef1                       | 6                 | 22                    | 4.3           |
| 13   | 32693297  | Tef1                       | 16                | 45                    | 23.9          |
|      | 6321968   | Eno2                       | 13                | 56                    | 17.7          |
|      | 1633520   | PG Kinase                  | 7                 | 27                    | 6.1           |
|      | 33357107  | ATP Sulfurylase            | 9                 | 15                    | 5.2           |
| 14   | 6325086   | Ove3                       | 5                 | 21                    | 2.5           |
|      | 71064089  | TAO3p                      | 16                | 7                     | 0.7           |
| 15   | 6321631   | Tdh3                       | 11                | 59                    | 9.2           |
|      | 6323387   | Ilv5                       | 11                | 29                    | 8.3           |
|      | 49258842  | Ribosomal D Ch D           | 8                 | 35                    | 3.5           |
|      | 6319847   | Cdc10p                     | 7                 | 42                    | 2.1           |
| 16   | 6321631   | Tdh3                       | 11                | 54                    | 14.4          |
|      | 6323371   | Rpp0                       | 8                 | 26                    | 9.1           |
|      | 112491285 | Alcohol Dehydrogenase      | 7                 | 21                    | 7.1           |
|      | 13787035  | A Ch A                     | 7                 | 31                    | 3.8           |
|      | 6325126   | Rpl5                       | 6                 | 40                    | 3.4           |
| 17   | 2624630   | PG Mutase                  | 13                | 57                    | 16.9          |
|      | 6323077   | Rps0bp                     | 6                 | 33                    | 3.3           |
| 18   | 2624630   | PG Mutase                  | 12                | 52                    | 16            |
| 19   | 1164943   | YOR3177w                   | 7                 | 49                    | 6.4           |
|      | 6323104   | Rpl10                      | 7                 | 34                    | 4.1           |
| 20   | 6323613   | Tsa1                       | 10                | 59                    | 6.4           |
|      | 1084771   | L18a.e.c13                 | 7                 | 33                    | 3.4           |
| 21   | 6320269   | Rps13                      | 7                 | 35                    | 4.9           |
| 22   | 15988133  | B Chain B, nucleosome      | 5                 | 52                    | 4.1           |
|      | 49258862  | W Chain W RiboEef2Sordarin | 4                 | 33                    | 2.9           |

**Mlp2p-PrA; Δnup1p**

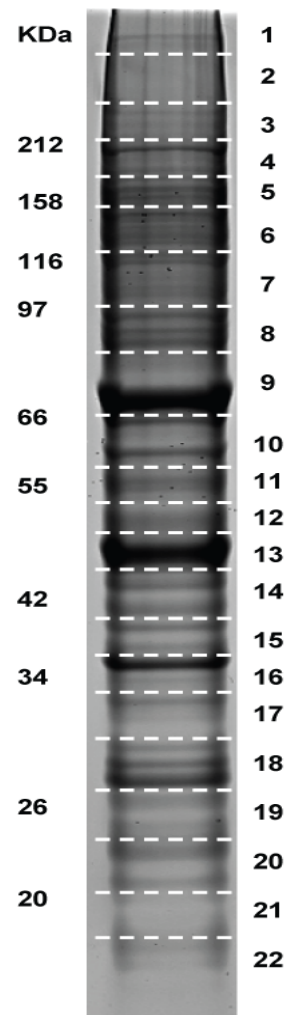

Supplemental Table 5 - Proteins identified in gels shown in Figure 2C

**Mlp1p-PrA, nup188Δ**

| Band | NCBI-GI   | NAME                        | MS (nr. peptides) | Sequence coverage (%) | Xproteo score |
|------|-----------|-----------------------------|-------------------|-----------------------|---------------|
| 1    | 6322948   | Mlp1                        | 34                | 24                    | 39            |
| 2    | 6322948   | Mlp1                        | 28                | 19                    | 32.6          |
| 3    | 6322948   | Mlp1                        | 25                | 19                    | 26            |
| 4    | 6322948   | Mlp1                        | 53                | 35                    | 45.5          |
| 5    | 171959    | Mlp1                        | 28                | 19                    | 17.9          |
|      | 6322076   | Nup159                      | 25                | 27                    | 16            |
| 6    | 6322421   | Nup192                      | 21                | 19                    | 19.2          |
|      | 171959    | Mlp1                        | 16                | 14                    | 9             |
| 7    | 6323777   | Pom152                      | 25                | 22                    | 18.9          |
|      | 6319392   | Nup170                      | 21                | 14                    | 14.8          |
|      | 6320952   | Nup157                      | 21                | 19                    | 11.6          |
|      | 6320363   | Sac3                        | 15                | 16                    | 6.4           |
|      | 171959    | Mlp1                        | 12                | 9                     | 4.1           |
| 8    | 6322935   | Nup133                      | 13                | 13                    | 14.3          |
| 9    | 171959    | Mlp1                        | 19                | 14                    | 12.3          |
|      | 6322793   | Nup120                      | 9                 | 10                    | 5             |
| 10   | 6322793   | Nup120                      | 21                | 24                    | 27.9          |
|      | 172054    | Nsp1                        | 22                | 51                    | 23.4          |
|      | 6323367   | Nup2                        | 8                 | 18                    | 5.5           |
| 11   | 14318524  | Nie96                       | 17                | 26                    | 14.6          |
|      | 6323379   | Kap95                       | 13                | 20                    | 12.6          |
|      | 6323367   | Nup2                        | 13                | 26                    | 10.4          |
| 12   | 6322502   | Nup85                       | 16                | 29                    | 22.6          |
|      | 6321346   | Nup145C                     | 16                | 14                    | 16.4          |
|      | 6320087   | Nup84                       | 13                | 25                    | 14.1          |
|      | 6322400   | Nup82                       | 8                 | 13                    | 5.4           |
| 13   | 417149    | SSA1                        | 15                | 29                    | 24.3          |
|      | 6325088   | Mex67                       | 6                 | 18                    | 6             |
|      | 6319318   | Nup60                       | 6                 | 18                    | 4.4           |
| 14   | 6325088   | Mex67                       | 12                | 23                    | 24.4          |
|      | 454437    | 70 kDa heat shock protein   | 4                 | 32                    | 4.8           |
| 15   | 7546348   | Kap alpha                   | 7                 | 25                    | 11.7          |
|      | 6322556   | Yjr096wp                    | 4                 | 18                    | 2.8           |
| 16   | 6322815   | Ugp1p                       | 15                | 40                    | 12.4          |
| 17   | 171959    | Mlp1                        | 7                 | 4                     | 1.3           |
| 18   | 6324500   | Thp1                        | 12                | 30                    | 15.5          |
|      | 6319594   | Tef2                        | 10                | 29                    | 11.3          |
| 19   | 6321338   | Seh1                        | 9                 | 31                    | 12.8          |
|      | 49258841  | CchC sordarin               | 7                 | 14                    | 2.9           |
| 20   | 112491285 | Yeast Alcohol Dehydrogenase | 8                 | 33                    | 5.9           |
|      | 49258842  | DchD sordarin               | 8                 | 38                    | 5             |
|      | 6321631   | Tdh3                        | 8                 | 49                    | 3.5           |
| 21   | 6323237   | Sec13                       | 14                | 56                    | 22.1          |
|      | 6323371   | Rpp0p                       | 5                 | 21                    | 2.6           |
| 22   | 6320589   | Yra1                        | 9                 | 34                    | 14.7          |
|      | 6321919   | Yhr127wp                    | 6                 | 32                    | 8.7           |
|      | 596086    | YL6b                        | 5                 | 38                    | 4.7           |
|      | 49258844  | FchF sordarin               | 5                 | 31                    | 3.1           |
|      | 49258822  | BehB sordarin               | 4                 | 34                    | 2.9           |
| 23   | 49258854  | PehP sordarin               | 5                 | 33                    | 4.4           |
|      | 6322284   | Rp117bp                     | 5                 | 35                    | 3.5           |
| 24   | 110590423 | Cdc31p                      | 4                 | 17                    | 2.5           |
| 25   | 110590423 | Cdc31                       | 4                 | 24                    | 7             |
|      | 49258830  | KchK sordarin               | 4                 | 34                    | 5.6           |
| 26   | 6322035   | Ubp7p                       | 6                 | 10                    | 2.6           |

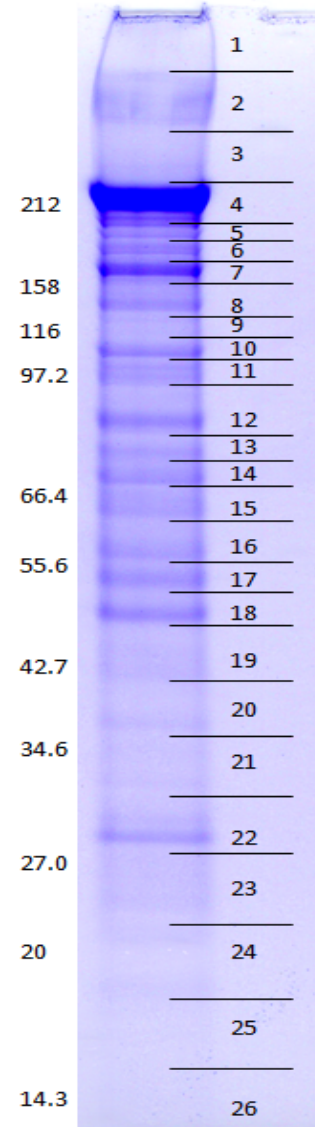

**Mlp1p-PrA, pom152Δ**

| Band | NCBI-GI   | NAME           | MS (nr. peptides) | Sequence coverage (%) | Xproteo score |
|------|-----------|----------------|-------------------|-----------------------|---------------|
| 1    | 6322948   | Mlp1           | 35                | 23                    | 33            |
| 2    | 6322948   | Mlp1           | 22                | 13                    | 21.4          |
| 3    | 6322948   | Mlp1           | 22                | 16                    | 17.4          |
|      | 6323875   | Esc1           | 7                 | 7                     | 2.6           |
| 4    | 171959    | Mlp1           | 51                | 28                    | 48.6          |
| 5    | 6322076   | Nup159         | 33                | 34                    | 25            |
|      | 6322948   | Mlp1           | 23                | 15                    | 11            |
|      | 6322042   | Mlp2           | 14                | 12                    | 3.4           |
| 6    | 6322421   | Nup192         | 23                | 16                    | 17.6          |
|      | 6319392   | Nup170         | 25                | 19                    | 16.5          |
|      | 6323533   | Nup188         | 15                | 14                    | 7.9           |
| 7    | 6322935   | Nup133         | 15                | 19                    | 16.2          |
|      | 6320952   | Nup157         | 7                 | 9                     | 2.9           |
| 8    | 172054    | Nsp1           | 13                | 28                    | 15.3          |
| 9    | 14318524  | Nie96          | 24                | 33                    | 25.3          |
|      | 67464126  | Kap95          | 15                | 31                    | 14.2          |
|      | 172054    | Nsp1           | 15                | 35                    | 10.1          |
|      | 6323367   | Nup2           | 11                | 23                    | 5.8           |
| 10   | 6320087   | Nup84          | 16                | 31                    | 17.5          |
|      | 6321346   | Nup145         | 17                | 12                    | 15.8          |
|      | 1019944   | Nup85          | 16                | 26                    | 12.8          |
|      | 6323004   | Ssa2           | 12                | 23                    | 7.5           |
|      | 6322400   | Nup82          | 9                 | 16                    | 4.9           |
| 11   | 6325088   | Mex67          | 13                | 37                    | 18.2          |
|      | 83754477  | Kap60          | 7                 | 23                    | 5.1           |
| 12   | 6322815   | Ugp1p          | 9                 | 31                    | 4.8           |
|      | 6319279   | Cdc19          | 10                | 29                    | 3.5           |
| 13   | 6321266   | Nup49          | 3                 | 8                     | 1.4           |
| 14   | 6319594   | Ter2           | 10                | 25                    | 9.3           |
| 15   | 6321338   | Seh1           | 9                 | 31                    | 15.2          |
|      | 6320954   | Gle2           | 5                 | 27                    | 5.1           |
| 16   | 49258842  | DChD sordarin  | 6                 | 30                    | 7.8           |
|      | 6322411   | Mtr4           | 9                 | 10                    | 6.9           |
|      | 6321631   | Tdh3           | 6                 | 39                    | 6.9           |
|      | 6321338   | Seh1           | 4                 | 15                    | 2.6           |
|      | 6320954   | Gle2           | 4                 | 23                    | 2.5           |
| 17   | 6323237   | Sec13          | 7                 | 39                    | 4             |
|      | 6323371   | Rpp0           | 5                 | 21                    | 2.3           |
| 18   | 6323237   | Sec13          | 3                 | 19                    | 2.8           |
|      | 6320589   | Yra1           | 6                 | 29                    | 5.9           |
| 19   | 2624630   | AchA PG Mutase | 7                 | 44                    | 5.2           |
|      | 6325058   | Rpl7bp         | 6                 | 26                    | 3.1           |
| 20   | 6320979   | Pmd1           | 6                 | 6                     | 1.9           |
| 21   | 6325276   | Cdc54          | 9                 | 15                    | 2.8           |
| 22   | 6324831   | Cdc31          | 5                 | 49                    | 9.8           |
| 23   | 110590423 | Cdc31          | 4                 | 24                    | 10            |

**Mlp1p-PrA; Δpom152p**

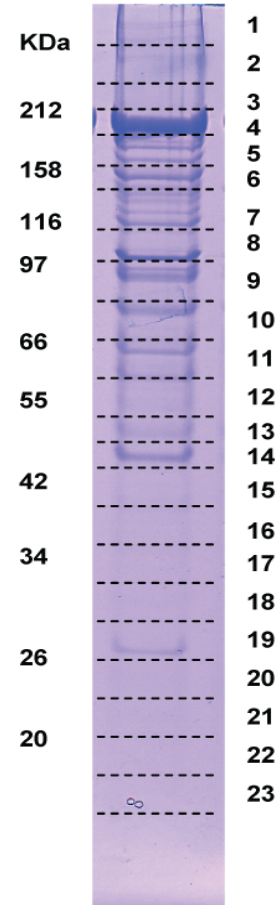



**Mlp1p-PrA, nup53Δ**

| Band | NCBI-GI  | NAME            | MS (nr. peptides) | Sequence coverage (%) | Xproteo score |
|------|----------|-----------------|-------------------|-----------------------|---------------|
| 1    | 6322948  | Mlp1            | 22                | 18                    | 19.2          |
| 2    | 6322948  | Mlp1            | 23                | 16                    | 18.1          |
| 3    | 171959   | Mlp1            | 11                | 8                     | 7.6           |
| 4    | 6322948  | Mlp1            | 33                | 22                    | 34.1          |
| 5    | 6322076  | Nup159          | 8                 | 9                     | 6.5           |
|      | 6322948  | Mlp1            | 7                 | 7                     | 3.3           |
| 6    | 6322421  | Nup192          | 11                | 10                    | 10.1          |
|      | 6323533  | Nup188          | 8                 | 9                     | 4.1           |
| 7    | 6323777  | Pom152          | 12                | 15                    | 14.1          |
|      | 6320952  | Nup157          | 6                 | 8                     | 3.6           |
| 8    | 6322935  | Nup133          | 19                | 16                    | 15.5          |
|      | 6324672  | Nup1            | 12                | 17                    | 8.8           |
|      | 6323691  | Nup116          | 7                 | 9                     | 4.6           |
| 9    | 6322556  | YJR096wp        | 3                 | 10                    | 1.2           |
| 10   | 172054   | Nsp1            | 24                | 45                    | 29.2          |
|      | 4049     | Nup2            | 8                 | 16                    | 7.7           |
|      | 14318524 | Nie96           | 7                 | 14                    | 6.2           |
|      | 6322793  | Nup120          | 7                 | 10                    | 4.9           |
| 11   | 14318524 | Nie96           | 29                | 34                    | 28.5          |
|      | 67464126 | Kap95           | 15                | 26                    | 12.6          |
| 12   | 6325088  | Mex67           | 6                 | 18                    | 6.3           |
|      | 4389267  | Kap alpha       | 5                 | 25                    | 4.4           |
| 13   | 6325088  | Mex67           | 10                | 19                    | 9.9           |
| 14   | 6320115  | Asm4            | 9                 | 25                    | 10.9          |
|      | 6325088  | Mex67           | 7                 | 21                    | 8.1           |
|      | 6324140  | Srp1            | 6                 | 21                    | 7.2           |
|      | 1945327  | Nup57           | 5                 | 14                    | 5.3           |
| 15   |          |                 |                   |                       |               |
| 16   | 6321266  | Nup49           | 8                 | 26                    | 6.4           |
| 17   | 32693297 | Tef1p           | 12                | 38                    | 18.3          |
|      | 6324500  | Thp1            | 7                 | 26                    | 7.9           |
|      | 6321338  | Seh1            | 5                 | 21                    | 4.7           |
| 18   | 19880894 | AF458973_3 TOP2 | 6                 | 6                     | 0.8           |
| 19   | 1633273  | Topoisomerase   | 4                 | 5                     | 0.4           |
| 20   | 6323237  | Sec13           | 9                 | 31                    | 7.9           |
| 21   | 6320589  | Yra1            | 6                 | 23                    | 9.7           |
| 22   | 2131277  | Hfm1            | 6                 | 13                    | 2.7           |
| 23   | 6320979  | Pmd1            | 8                 | 8                     | 4             |
| 24   | 2447041  | Ppf3            | 5                 | 3                     | 1.4           |
| 25   | 6322974  | Yll054cp        | 2                 | 3                     | 0.2           |
| 26   | 3720     | G3PD            | 4                 | 24                    | 2.5           |

**Mlp1p-PrA; Δnup53p**

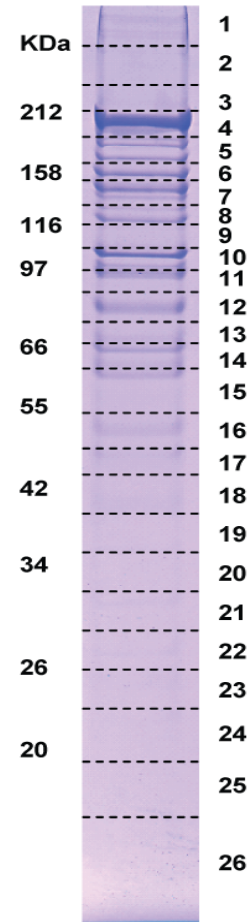

Supplemental Table 6 - Cleavage fragments identified in gels shown in Figure S1, A and B.

| Protein Name | Fragment ID    | Protease     | Mw of fragment | Cleavage site (by Mw estimation) | BAND INTENSITY | Fragment ID    | Protease     | Mw of fragment | Cleavage site (by Mw estimation) | BAND INTENSITY |
|--------------|----------------|--------------|----------------|----------------------------------|----------------|----------------|--------------|----------------|----------------------------------|----------------|
|              | C-terminal tag |              |                |                                  |                | N-terminal tag |              |                |                                  |                |
| Mlp1p        | Mlp1p-FL(GFP)  |              | 250            |                                  |                | -              |              |                |                                  |                |
|              |                |              |                |                                  |                | I              | AspN         | 2              | C30                              | +++            |
|              |                |              |                |                                  |                | H              |              | 12             | D105                             | +++            |
|              |                |              |                |                                  |                | G              |              | 22             | D189                             | +++            |
|              |                |              |                |                                  |                | F              |              | 25             | D210                             | ++             |
|              |                |              |                |                                  |                | E              |              | 28             | D233-237                         | +              |
|              |                |              |                |                                  |                | D              |              | 41             | D342                             | +              |
|              | A              | AspN         | 177            | D525                             | ++             | C              |              | 83             | D714                             | +++            |
|              | C              |              | 154            | D778                             | +++            | B              |              | 111            | D949                             | +++            |
|              | D              |              | 133            | D945                             | ++             | A              |              | 132            | D1130                            | +              |
|              | E              |              | 124            | D1030                            | +++            |                |              |                |                                  |                |
|              | F              |              | 112            | D1131                            | +              |                |              |                |                                  |                |
|              | G              |              | 102            | D1208                            | ++             |                |              |                |                                  |                |
|              | H              |              | 88             | D1348                            | +              |                |              |                |                                  |                |
|              | I              |              | 66             | D1471                            | ++             |                |              |                |                                  |                |
|              | M              |              | 50             | D1645                            | +++            |                |              |                |                                  |                |
|              | N              |              | 42             | D1741                            | +++            |                |              |                |                                  |                |
|              |                |              |                |                                  |                | (CFP)Mlp1p-FL  |              | 250            |                                  |                |
| Mlp2p        | Mlp2-FL(PrA)   |              | 221            |                                  |                | U              | Trypsin/AspN | 6              | D48                              | +              |
|              |                |              |                |                                  |                | T              | Trypsin/AspN | 8              | D66                              | +              |
|              |                |              |                |                                  |                | S              | AspN         | 12             | D98-D116                         | +              |
|              | A'''           | AspN         | 204            | D140                             | +              | Q              | ApsN         | 17             | D139                             | +++            |
|              |                |              |                |                                  |                | Q'             | AspN         | 20             | D175                             | +              |
|              | A''            | all three    | 188            | D281                             | +              | P              | Trypsin/AspN | 30             | D259                             | +++            |
|              |                |              |                |                                  |                | M              | AspN         | 37             | D307                             | +++            |
|              | A'             | all three    | 167            | D460                             | +              | I              | AspN         | 42             | D366                             | +              |
|              | A              | all three    | 155            | D564                             | +              | G              | Trypsin/AspN | 59             | D504                             | ++             |
|              | B''            | Trypsin/AspN | 139            | D678-D740                        | +              | F              | all          | 68             | D593                             | +++            |
|              | B'             | AspN         | 130            | D768                             | +              | D              | all          | 101            | D870                             | ++             |
|              | B              | AspN         | 123            | D821-D851                        | +              | C              | AspN         | 111            | D940                             | +              |
|              | C              | all three    | 109            | D940-C996                        | +++            | B              | all          | 124            | D1086                            | +++            |
|              | D              | Trypsin/AspN | 95             | D1086                            | ++             |                |              |                |                                  |                |
|              | E              | Trypsin/AspN | 83             | D1165_D1203                      | +++            |                |              |                |                                  |                |
|              | F              | Trypsin/AspN | 73             | D1267                            | +++            |                |              |                |                                  |                |
|              | G              | AspN         | 68             | D1319                            | +              |                |              |                |                                  |                |
|              | H              | AspN         | 62             | D1356                            | ++             |                |              |                |                                  |                |
|              | I              | all three    | 52             | D1442                            | ++             |                |              |                |                                  |                |
|              | L'             | Trypsin/AspN | 46             | D1497                            | +              |                |              |                |                                  |                |
|              | L              | all three    | 42             | D1545                            | +++            |                |              |                |                                  |                |
|              | M              | all three    | 31             | D1632                            | +              |                |              |                |                                  |                |

Supplemental Table 7 – List of *S. cerevisiae* strains used in this study

| Strain Name | Descriptive Name   | Relevant Genotype                                                                                                               | Derivation                                                     |
|-------------|--------------------|---------------------------------------------------------------------------------------------------------------------------------|----------------------------------------------------------------|
| W303        | wild type          | <i>Mata/alpha, leu2-3,112/leu2-3,112, his3-11,15/his3-11,15, trp1-1/trp1-1, can1-100/can1-100, ade2-1/ade2-1, ura3-1/ura3-1</i> | (Thomas and Rothstein, 1989)                                   |
| BY4741      | wild type          | <i>MATa, his3Δ1, leu2Δ0, met15Δ0, ura3Δ0</i>                                                                                    | (Brachmann et al., 1998)                                       |
| yCS135      | Δmlp1, Δmlp2       | <i>W303 Matalpha, mlp1::URA3, mlp2::HIS3</i>                                                                                    | (Strambio-de-Castillia et al., 1999)                           |
| yCS137      | wild type          | <i>W303 Mata</i>                                                                                                                | (Strambio-de-Castillia et al., 1999)                           |
| yCS138      | Δmlp1, Δmlp2, 2n   | <i>W303 Mata/Matalpha, mlp1::URA3/mlp1::URA3, mlp2::HIS3/mlp2::HIS3</i>                                                         | (Strambio-de-Castillia et al., 1999)                           |
| yCS108      | Mlp1p-PrA          | <i>W303, Mata, MLP1-PrA(HIS2, URA3)</i>                                                                                         | (Strambio-de-Castillia et al., 1999)                           |
| yMN135      | PrA-Mlp1p          | <i>W303, Mata, PrA-MLP1</i>                                                                                                     | Genomic tagging                                                |
| yCS115      | Mlp2p-PrA          | <i>W303, Mata, MLP2-PrA(HIS2, URA3)</i>                                                                                         | (Strambio-de-Castillia et al., 1999)                           |
| yMN137      | PrA-Mlp2p          | <i>W303, Mata, PrA-MLP1</i>                                                                                                     | Genomic tagging                                                |
| yMN784      | Mlp1p-PrA, Δnup1   | <i>W303xBY4741, Mata, MLP1-PrA(HIS2, URA3), nup1::kanMX</i>                                                                     | Segregant of mating yCS108 with Δnup1 (Giaever et al., 2002)   |
| yMN785      | Mlp1p-PrA, Δnup60  | <i>W303xBY4741, Matalpha, MLP1-PrA(HIS2, URA3), nup60::kanMX</i>                                                                | Segregant of mating yCS108 with Δnup60 (Giaever et al., 2002)  |
| yMN786      | Mlp1p-PrA, Δnup84  | <i>W303xBY4741, Matalpha, MLP1-PrA(HIS2, URA3), nup84::kanMX</i>                                                                | Segregant of mating yCS108 with Δnup84 (Giaever et al., 2002)  |
| yMN787      | Mlp1p-PrA, Δnup53  | <i>W303xBY4741, Mata, MLP1-PrA(HIS2, URA3), nup53::kanMX</i>                                                                    | Segregant of mating yCS108 with Δnup53 (Giaever et al., 2002)  |
| yMN788      | Mlp1p-PrA, Δpom152 | <i>W303xBY4741, Matalpha, MLP1-PrA(HIS2, URA3), pom152::kanMX</i>                                                               | Segregant of mating yCS108 with Δpom152 (Giaever et al., 2002) |
| yMN789      | Mlp1p-PrA, Δnup188 | <i>W303xBY4741, Matalpha, MLP1-PrA(HIS2, URA3), nup188::kanMX</i>                                                               | Segregant of mating yCS108 with Δnup188 (Giaever et al., 2002) |

|        |                                          |                                                                                           |                                                                       |
|--------|------------------------------------------|-------------------------------------------------------------------------------------------|-----------------------------------------------------------------------|
| yMN790 | Mlp2p-PrA, $\Delta$ nup1                 | <i>W303xBY4741, Matalpha, MLP2-PrA(HIS2, URA3), nup1::kanMX</i>                           | Segregant of mating yCS115 with $\Delta$ nup1 (Giaever et al., 2002)  |
| yMN791 | Mlp2p-PrA, $\Delta$ nup60                | <i>W303xBY4741, Matalpha, MLP2-PrA(HIS2, URA3), nup60::kanMX</i>                          | Segregant of mating yCS115 with $\Delta$ nup60 (Giaever et al., 2002) |
| yMN792 | Mlp2p-PrA, $\Delta$ nup84                | <i>W303xBY4741, Matalpha, MLP1-PrA(HIS2, URA3), nup84::kanMX</i>                          | Segregant of mating yCS115 with $\Delta$ nup84 (Giaever et al., 2002) |
| yMN640 | Esc1p-PrA                                | <i>W303, Mata, Esc1-PrA(HIS2)</i>                                                         | Genomic tagging                                                       |
| yCS348 | CFP-Mlp1p                                | <i>W303, Mata, ECFP-MLP1</i>                                                              | (Niepel et al., 2005)                                                 |
| yMN621 | Mlp1p-GFP                                | <i>BY4741, Mata, Mlp1-GFP(HIS2)</i>                                                       | (Huh et al., 2003)                                                    |
| yMN654 | Mlp1p-GFP, Mlp2p-GFP                     | <i>BY4741, Mata, Mlp1-GFP(HIS2), Mlp2-GFP(His2)</i>                                       | Segregant of mating yMN621 with Mlp2p-GFP (Huh et al., 2003)          |
| yCS141 | $\Delta$ mlp1, $\Delta$ mlp2             | <i>W303, Matalpha, mlp1::ura3::LEU2, mlp2::HIS2</i>                                       | this study                                                            |
| yCS374 | Nup49p-GFP                               | <i>W303, Matalpha, nup49-1::URA3, nup49-GLFG-GFP-S65T(TRP1)</i>                           | Segregant of mating SWY734 (Bucci and Wentz, 1997) with yCS141        |
| yCS377 | Nup49p-GFP, $\Delta$ mlp1, $\Delta$ mlp2 | <i>W303, Mata, mlp1::ura3::LEU2, mlp2::HIS2, nup49-1::URA3, nup49-GLFG-GFP-S65T(TRP1)</i> | Segregant of mating SWY734 (Bucci and Wentz, 1997) with yCS141        |
| yCS211 | $\Delta$ mlp1, $\Delta$ mlp2             | <i>W303, mat a, mlp1::URA3, mlp2::his2::LEU2</i>                                          | this study                                                            |
| yMN173 | Mlp1p-MYC                                | <i>W303, Matalpha, MLP1-MYC(TRP1)</i>                                                     | (Niepel et al., 2005)                                                 |
| yMN179 | Mlp2p-MYC                                | <i>W303, Matalpha, MLP2-MYC(TRP1)</i>                                                     | (Niepel et al., 2005)                                                 |
| yMN300 | Mlp1p-PrA, Mlp2p-MYC                     | <i>W303, Mata, MLP1-PrA(HIS2, URA3), MLP2-MYC(TRP1)</i>                                   | Segregant of mating yCS108 with yMN179                                |
| yMN302 | Mlp2p-PrA, Mlp1p-MYC                     | <i>W303, Mata, MLP2-PrA(HIS2, URA3), MLP1-MYC(TRP1)</i>                                   | Segregant of mating yCS115 with yMN173                                |
| yMN755 | Nup60-GFP                                | <i>BY4741, Mata, Nup60-GFP(HIS2)</i>                                                      | (Huh et al., 2003)                                                    |
| yMN756 | Esc1-GFP                                 | <i>BY4741, Mata, Esc1-GFP(HIS2)</i>                                                       | (Huh et al., 2003)                                                    |

|        |                                        |                                                               |                                    |
|--------|----------------------------------------|---------------------------------------------------------------|------------------------------------|
| yMN459 | $\Delta$ mlp1, $\Delta$ mlp2           | <i>W303, Matalpha, mlp1::URA3, mlp2::LEU2</i>                 | this study                         |
| yMN806 | Esc1-GFP                               | BY4741xW303, Mata, Esc1-GFP(HIS2)                             | spore 2a of mating yMN459 x yMN756 |
| yMN807 | Esc1-GFP, $\Delta$ mlp1, $\Delta$ mlp2 | BY4741xW303, Mata, Esc1-GFP(HIS2), mlp1::URA3, mlp2::LEU2     | spore 2c of mating yMN459 x yMN756 |
| yMN808 | Esc1-GFP                               | BY4741xW303, Mata, Esc1-GFP(HIS2)                             | spore 5b of mating yMN459 x yMN756 |
| yMN809 | Esc1-GFP, $\Delta$ mlp1, $\Delta$ mlp2 | BY4741xW303, Matalpha, Esc1-GFP(HIS2), mlp1::URA3, mlp2::LEU2 | spore 5c of mating yMN459 x yMN756 |
| yMN810 | Esc1-GFP                               | BY4741xW303, Mata, Esc1-GFP(HIS2)                             | spore 6a of mating yMN459 x yMN756 |
| yMN811 | Esc1-GFP, $\Delta$ mlp1, $\Delta$ mlp2 | BY4741xW303, Matalpha, Esc1-GFP(HIS2), mlp1::URA3, mlp2::LEU2 | spore 6b of mating yMN459 x yMN756 |
| yCS258 | $\Delta$ nup133                        | <i>W303, Mata, nup133::HIS3</i>                               | (Doye et al., 1994)                |
